# Supplementary material
Source: PubMed Central journal article supplement (PMC8454720)
Supplement: mmc1.pdf [file mmc1.pdf]

**Severe COVID-19 in people with type 1 and type 2 diabetes in  
Sweden: a nationwide retrospective cohort study**

**Supplementary Appendix**

# Table of contents

|                                                                                                                                                                             |           |
|-----------------------------------------------------------------------------------------------------------------------------------------------------------------------------|-----------|
| <b>SEVERE COVID-19 IN PEOPLE WITH TYPE 1 AND TYPE 2 DIABETES IN SWEDEN: A NATIONWIDE RETROSPECTIVE COHORT STUDY</b>                                                         | <b>1</b>  |
| <b>Table S1. ICD and ATC CODES USES</b>                                                                                                                                     | <b>3</b>  |
| <b>Supplementary Figure S1: Flow chart of statistical analyses and number of study participants</b>                                                                         | <b>5</b>  |
| <b>Supplementary Figure S2: Risk for hospitalization, mortality and intensive care due to covid-19 in patients with diabetes (crude measure of association)</b>             | <b>6</b>  |
| <b>Supplementary Figure S3: Relative variable importance for covid-19 related outcomes and death among patients with diabetes</b>                                           | <b>7</b>  |
| <b>Supplementary Table S2: Baseline characteristics for patients with diabetes and matched controls that were hospitalized due to covid-19 infection</b>                    | <b>8</b>  |
| <b>Supplementary Table S3: Baseline characteristics for patients with diabetes and matched controls that were admitted to intensive care due to covid-19</b>                | <b>10</b> |
| <b>Supplementary Table S4: Baseline characteristics for patients with diabetes and matched controls that died due to covid-19</b>                                           | <b>12</b> |
| <b>Supplementary Table S5: Incidence rates for hospitalization of covid-19 infection among patients with diabetes and controls, according to age-categories</b>             | <b>14</b> |
| <b>Supplementary Table S6: Incidence rates for admission to intensive care of covid-19 infection among patients with diabetes and controls, according to age-categories</b> | <b>15</b> |
| <b>Supplementary Table S7: Incidence rates for mortality from covid-19 infection among patients with diabetes and controls, according to age-categories</b>                 | <b>16</b> |
| <b>Supplementary Table S8: Cox regression model for hospitalization of covid-19 in diabetes and controls</b>                                                                | <b>17</b> |
| <b>Supplementary Table S9: Cox regression model for admission to intensive care due to covid-19 in diabetes and controls</b>                                                | <b>18</b> |
| <b>Supplementary Table S10: Cox regression model for mortality due to covid-19 in diabetes and controls</b>                                                                 | <b>19</b> |

| <b>Table S1. ICD and ATC CODES USES</b>       |                                                                                                                                                                                                                                                                                                                                                                                                                                                                                                                                                                                                                                                           |
|-----------------------------------------------|-----------------------------------------------------------------------------------------------------------------------------------------------------------------------------------------------------------------------------------------------------------------------------------------------------------------------------------------------------------------------------------------------------------------------------------------------------------------------------------------------------------------------------------------------------------------------------------------------------------------------------------------------------------|
| <b>Outcomes</b>                               | <b>ICD</b>                                                                                                                                                                                                                                                                                                                                                                                                                                                                                                                                                                                                                                                |
| COVID-19 infection                            | U071, U072, U099, U091                                                                                                                                                                                                                                                                                                                                                                                                                                                                                                                                                                                                                                    |
| Admission to intensive-care unit for COVID-19 | DG016, DG018, DG020, DG022, DG023, DG026, DV023, GBB03, GBB00, DG002, DG017, DG021                                                                                                                                                                                                                                                                                                                                                                                                                                                                                                                                                                        |
| Coronary heart disease                        | I209, I208, I200, I201, I214, I219, I210, I211, I213, I212, I229, I220, I221, I228, I230, I238, I232, I233, I236, I235, I231, I234, I249, I241, I248, I240, I259, I251, I252, I258, I255, I250, I256, I253, I254                                                                                                                                                                                                                                                                                                                                                                                                                                          |
| Acute myocardial infarction                   | I214, I219, I210, I211, I213, I212                                                                                                                                                                                                                                                                                                                                                                                                                                                                                                                                                                                                                        |
| Chronic obstructive pulmonary disease         | J449, J441, J440, J448                                                                                                                                                                                                                                                                                                                                                                                                                                                                                                                                                                                                                                    |
| Dementia                                      | F001, F002, F009, F000, F019, F012, F011, F013, F018, F010, F023, F028, F020, F039                                                                                                                                                                                                                                                                                                                                                                                                                                                                                                                                                                        |
| Renal disease                                 | N083, N179, N178, N170, N171, N172, N189, N181, N182, N183, N184, N185, N199, Z940, DR016, DR024, E112, E112C, E112W, E112X, E102, E102C, E102W, E102X, E132, E142, E122, E112A, E112B, I120, Z992, DR013, DR023, DR056, Z491, Z492                                                                                                                                                                                                                                                                                                                                                                                                                       |
| Heart failure                                 | I420, I429, I421, I422, I428, I426, I425, I427, I423, I424, I500, I509, I501                                                                                                                                                                                                                                                                                                                                                                                                                                                                                                                                                                              |
| Stroke                                        | I619, I610, I612, I614, I611, I613, I618, I616, I615, I620, I629, I621, I639, I633, I634, I635, I638, I630, I632, I631, I636, I649                                                                                                                                                                                                                                                                                                                                                                                                                                                                                                                        |
| Peripheral arterial disease                   | I702, I739                                                                                                                                                                                                                                                                                                                                                                                                                                                                                                                                                                                                                                                |
| Valvular disease                              | I050, I052, I051, I059, I058, I060, I061, I062, I069, I068, I071, I070, I072, I079, I078, I088, I089, I080, I083, I081, I082, I099, I092, I090, I091, I098, I340, I341, I342, I348, I349, I350, I351, I352, I359, I358, I361, I369, I360, I368, I362                                                                                                                                                                                                                                                                                                                                                                                                      |
| Atrial fibrillation                           | I489, I480, I481, I482, I483, I484                                                                                                                                                                                                                                                                                                                                                                                                                                                                                                                                                                                                                        |
| Hypertension                                  | I109, I110, I119, I120, I129, I132, I139, I130, I131, I159, I150, I151, I152, I158                                                                                                                                                                                                                                                                                                                                                                                                                                                                                                                                                                        |
| Asthma                                        | J459, J451, J451A, J451W, J450, J450A, J450B, J450W, J458, J469                                                                                                                                                                                                                                                                                                                                                                                                                                                                                                                                                                                           |
| Alcohol induced mental disorder               | F102, F102A, F102B, F102X, F100, F103, F101, F104, F109, F105, F107, F107A, F107W, F106, F108                                                                                                                                                                                                                                                                                                                                                                                                                                                                                                                                                             |
| Drug induced mental disorder                  | F102, F102A, F102B, F102X, F100, F103, F101, F104, F109, F105, F107, F107A, F107W, F106, F108, F112, F110, F111, F113, F119, F115, F118, F114, F116, F117, F121, F122, F125, F120, F129, F123, F127, F128, F124, F126, F130, F132, F131, F133, F139, F134, F135, F138, F136, F137, F141, F142, F140, F145, F149, F143, F144, F146, F147, F148, F152, F155, F151, F150, F159, F153, F154, F157, F158, F156, F160, F165, F161, F169, F162, F168, F163, F164, F166, F167, F172, F179, F170, F171, F173, F174, F175, F176, F177, F178, F180, F189, F181, F182, F185, F188, F183, F184, F186, F187, F192, F191, F190, F195, F199, F193, F197, F198, F194, F196 |

|                                                                                                                                            |                                                                                                                                                                  |
|--------------------------------------------------------------------------------------------------------------------------------------------|------------------------------------------------------------------------------------------------------------------------------------------------------------------|
| Schizophrenia                                                                                                                              | F200, F209, F203, F201, F205, F208, F202, F206, F204, F219, F220, F229, F228, F239, F230, F238, F233, F231, F232, F249, F259, F250, F252, F251, F258, F289, F299 |
| Cancer                                                                                                                                     | C00 – C97                                                                                                                                                        |
| <b>ATC CODES</b>                                                                                                                           |                                                                                                                                                                  |
| Blood pressure medication                                                                                                                  | C09, C08, C07                                                                                                                                                    |
| Statins                                                                                                                                    | C10                                                                                                                                                              |
| Anticoagulants                                                                                                                             | B01AA, B01AE0, B01AF, B01AF, B01AB04, B01AB01                                                                                                                    |
| Antithrombotics                                                                                                                            | B01AC, B01AE, B01AX                                                                                                                                              |
| Outcomes identified in hospital discharge records using the International Classification of Diseases (ICD) codes 10 <sup>th</sup> revision |                                                                                                                                                                  |

**Supplementary Figure S1: Flow chart of statistical analyses and number of study participants**

**Supplementary Figure S1: Flow chart of study cohort and analyses performed.**

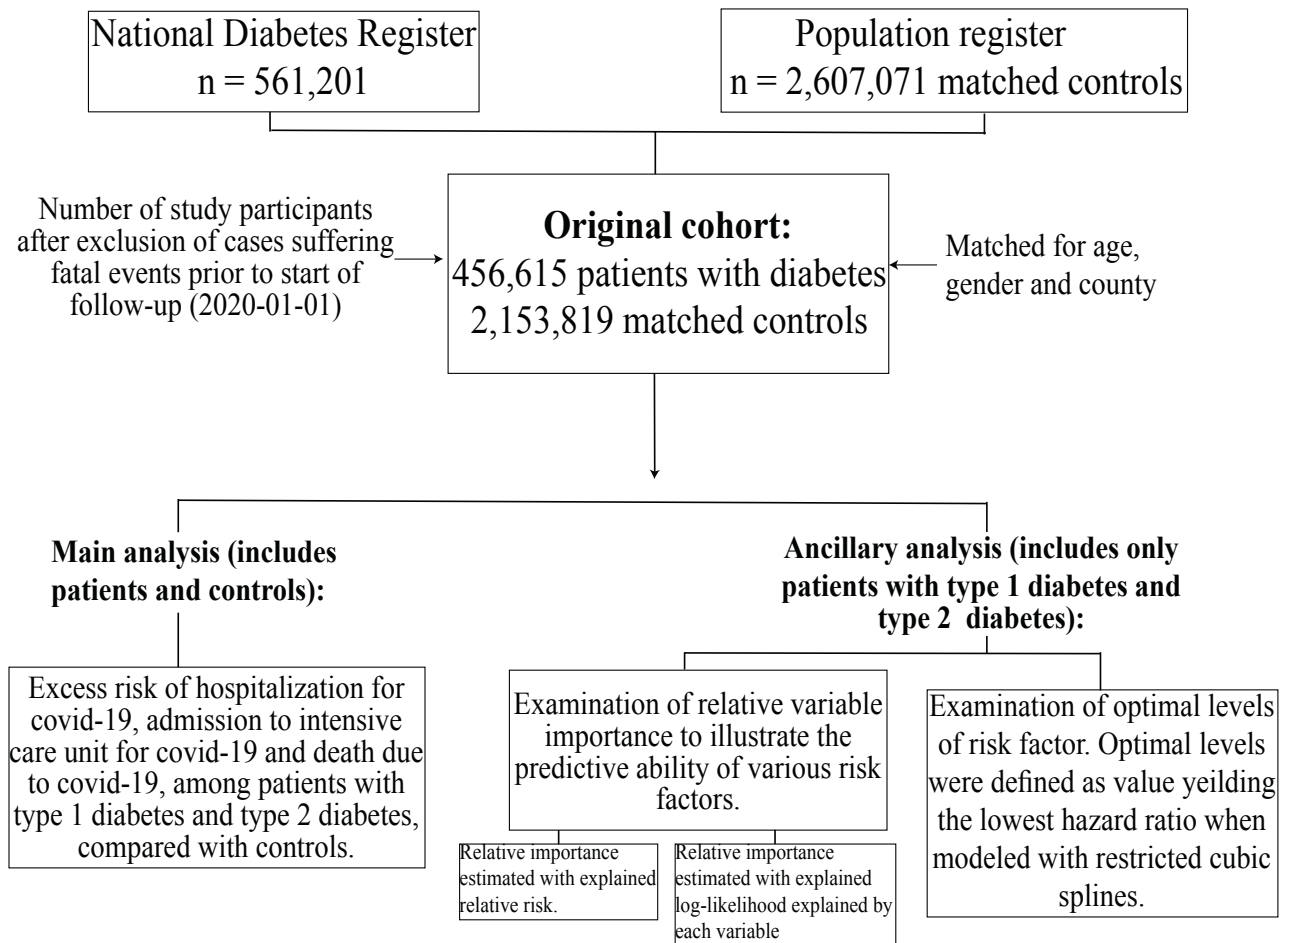

# Supplementary Figure S2: Risk for hospitalization, mortality and intensive care due to covid-19 in patients with diabetes (crude measure of association)

## Supplementary Figure S2: Risk for hospitalization, mortality and intensive-care due to covid-19 in patients with diabetes (crude measure of association)

Panel A: Hospitalization for covid-19 in patients with diabetes and matched controls

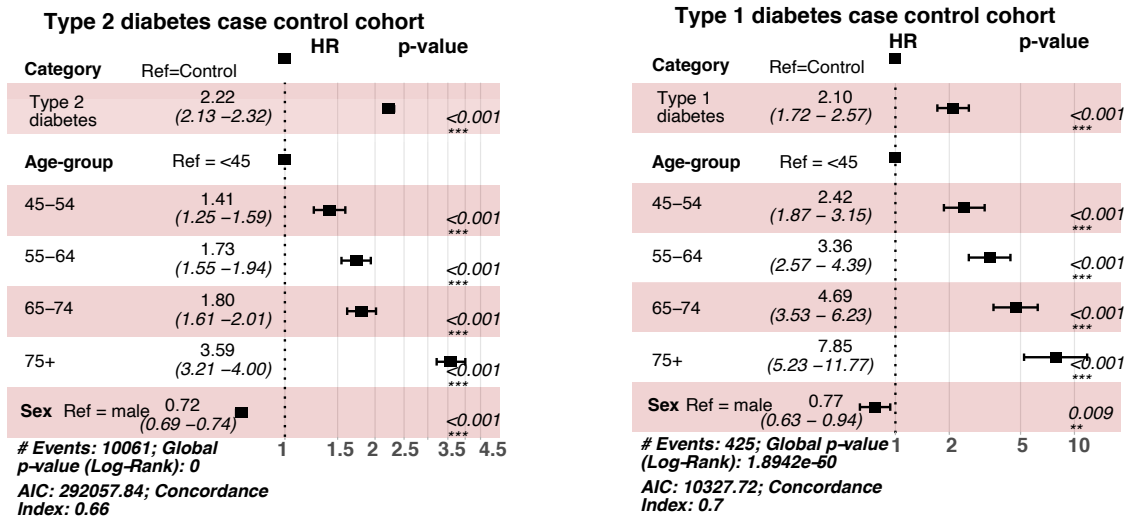

Panel B: Admission to ICU for covid-19 in patients with diabetes and matched controls

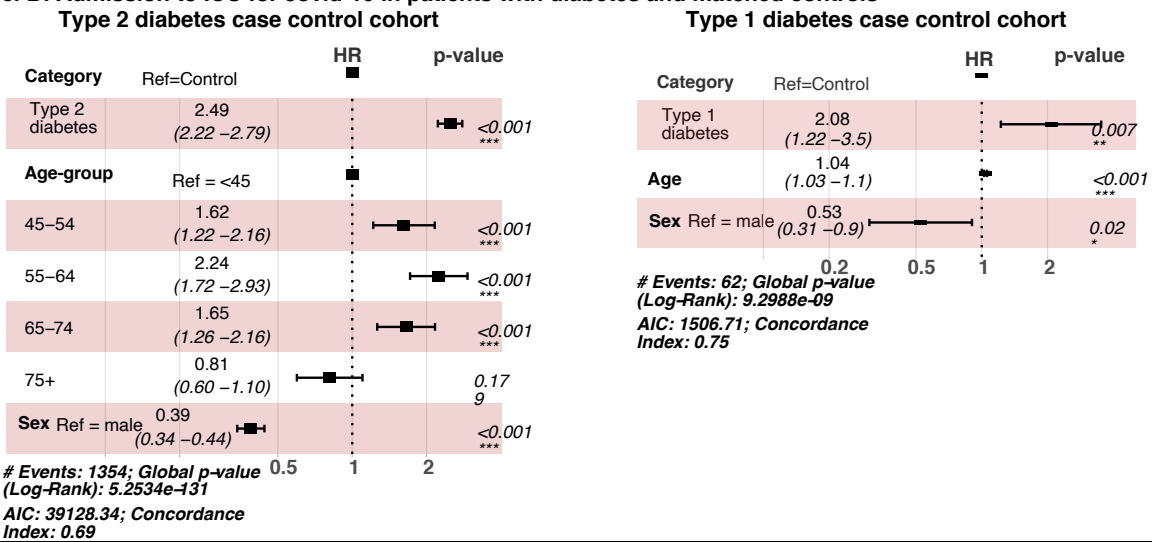

Panel C: Death due to covid-19 in patients with diabetes and matched controls

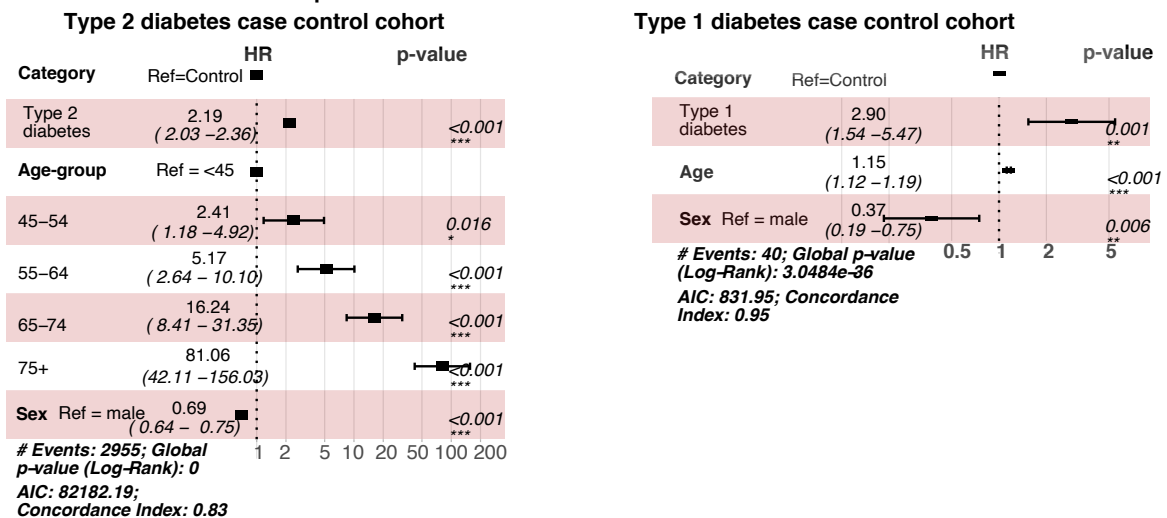

**Legend:** Panel A – C shows excess risk for hospitalization, admission to intensive care and death for COVID-19 patients with diabetes, according to Cox regression. All models were crude measure of risk as they were only adjusted for age and sex. For type 1 diabetes, age was modeled as a continuous variable in the regression model for admission to intensive care and death due to COVID-19

## Supplementary Figure S3: Relative variable importance for covid-19 related outcomes and death among patients with diabetes

**Supplementary Figure S3. Relative variable importance for COVID-19 related outcomes and death among patients with diabetes**

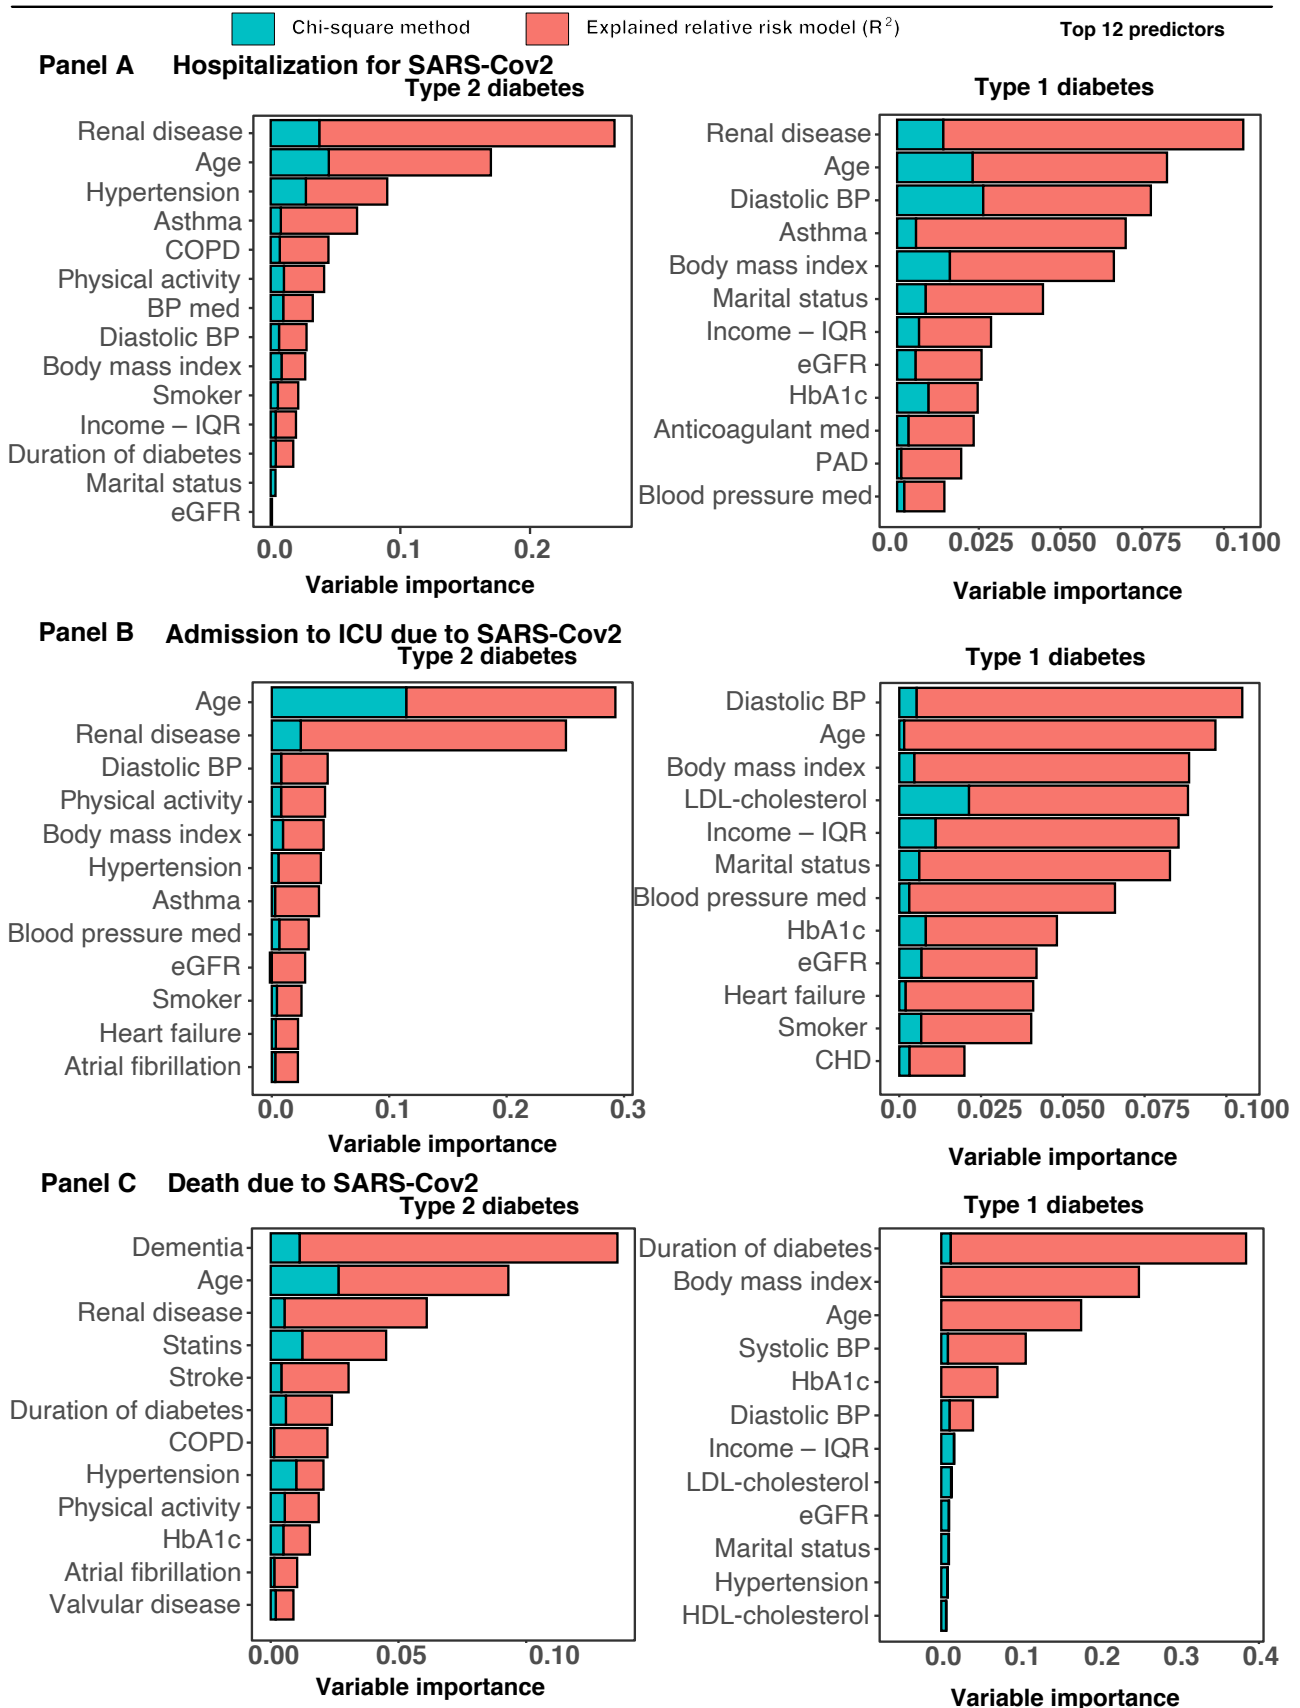

**Figure legend:** Relative importance for variables are measured with developed applications for the Cox regression model.

**Supplementary Table S2: Baseline characteristics for patients with diabetes and matched controls that were hospitalized due to covid-19 infection**

|                                             | T1D Ctrl      | T1D            | T2D Ctrl      | T2D           | T1D Ctrl hosp | T1D hosp       | T2D Ctrl hosp | T2D hosp      |
|---------------------------------------------|---------------|----------------|---------------|---------------|---------------|----------------|---------------|---------------|
| Number of study participants (n)            | 204638        | 44495          | 1942282       | 408533        | 281           | 144            | 6618          | 3443          |
| Sex = women (%)                             | 91045 (44.5)  | 19452 (43.7)   | 888246 (45.7) | 181293 (44.4) | 105 (37.4)    | 62 (43.1)      | 2593 (39.2)   | 1359 (39.5)   |
| Age (SD)                                    | 40.48 (15.41) | 42.57 (16.55)  | 63.36 (12.21) | 66.02 (13.24) | 50.05 (16.32) | 54.14 (17.56)  | 68.37 (11.78) | 68.96 (13.56) |
| Education (%)                               |               |                |               |               |               |                |               |               |
| Pre-secondary education                     | 33456 (16.3)  | 7782 (17.5)    | 451095 (23.2) | 137770 (33.7) | 52 (18.5)     | 43 (29.9)      | 2239 (33.8)   | 1467 (42.6)   |
| Secondary education                         | 94448 (46.2)  | 21008 (47.2)   | 861849 (44.4) | 183976 (45.0) | 157 (55.9)    | 65 (45.1)      | 2702 (40.8)   | 1362 (39.6)   |
| Post-secondary education                    | 76734 (37.5)  | 15705 (35.3)   | 629338 (32.4) | 86787 (21.2)  | 72 (25.6)     | 36 (25.0)      | 1677 (25.3)   | 614 (17.8)    |
| Marital status = Not married (%)            | 133719 (65.3) | 28654 (64.4)   | 902931 (46.5) | 204271 (50.0) | 166 (59.1)    | 82 (56.9)      | 3267 (49.4)   | 1734 (50.4)   |
| Ethnicity = Not Scandinavia (%)             | 18060 (8.8)   | 2826 (6.4)     | 233420 (12.0) | 79677 (19.5)  | 48 (17.1)     | 23 (16.0)      | 1677 (25.3)   | 1254 (36.4)   |
| Income family interquartile range (IQR) (%) |               |                |               |               |               |                |               |               |
| IQR 1                                       | 32421 (15.8)  | 8144 (18.3)    | 460781 (23.7) | 140091 (34.3) | 65 (23.1)     | 48 (33.3)      | 2242 (33.9)   | 1412 (41.0)   |
| IQR 2                                       | 48470 (23.7)  | 11087 (24.9)   | 475577 (24.5) | 114661 (28.1) | 80 (28.5)     | 43 (29.9)      | 1720 (26.0)   | 974 (28.3)    |
| IQR 3                                       | 55406 (27.1)  | 11705 (26.3)   | 493793 (25.4) | 89595 (21.9)  | 71 (25.3)     | 34 (23.6)      | 1365 (20.6)   | 630 (18.3)    |
| IQR4                                        | 68341 (33.4)  | 13559 (30.5)   | 512131 (26.4) | 64186 (15.7)  | 65 (23.1)     | 19 (13.2)      | 1291 (19.5)   | 427 (12.4)    |
| Income – family (IQR) (%)                   |               |                |               |               |               |                |               |               |
| IQR – family 1                              | 79332 (38.9)  | 17621 (39.7)   | 410760 (21.2) | 131091 (32.2) | 94 (33.5)     | 53 (37.1)      | 2042 (30.9)   | 1389 (40.4)   |
| IQR – family 2                              | 47128 (23.1)  | 10896 (24.6)   | 476477 (24.6) | 115292 (28.3) | 67 (23.8)     | 42 (29.4)      | 1670 (25.3)   | 989 (28.8)    |
| IQR – family 3                              | 43623 (21.4)  | 9060 (20.4)    | 508597 (26.3) | 89217 (21.9)  | 65 (23.1)     | 32 (22.4)      | 1424 (21.5)   | 594 (17.3)    |
| IQR – family 4                              | 33675 (16.5)  | 6792 (15.3)    | 538164 (27.8) | 71963 (17.7)  | 55 (19.6)     | 16 (11.2)      | 1476 (22.3)   | 464 (13.5)    |
| Coronary heart disease (%)                  | 4229 (2.1)    | 3455 (7.8)     | 176756 (9.1)  | 84654 (20.7)  | 22 (7.8)      | 35 (24.3)      | 1343 (20.3)   | 1160 (33.7)   |
| Acute myocardial infarction (%)             | 2174 (1.1)    | 1717 (3.9)     | 84862 (4.4)   | 41971 (10.3)  | 15 (5.3)      | 19 (13.2)      | 685 (10.4)    | 610 (17.7)    |
| Stroke (%)                                  | 2111 (1.0)    | 1344 (3.0)     | 84330 (4.3)   | 35209 (8.6)   | 15 (5.3)      | 13 (9.0)       | 810 (12.2)    | 584 (17.0)    |
| Heart failure (%)                           | 1921 (0.9)    | 1445 (3.2)     | 80963 (4.2)   | 43267 (10.6)  | 20 (7.1)      | 29 (20.1)      | 1175 (17.8)   | 948 (27.5)    |
| Valvular disease (%)                        | 1186 (0.6)    | 520 (1.2)      | 43411 (2.2)   | 15040 (3.7)   | 7 (2.5)       | 8 (5.6)        | 354 (5.3)     | 238 (6.9)     |
| Atrial fibrillation (%)                     | 3644 (1.8)    | 1199 (2.7)     | 153896 (7.9)  | 55628 (13.6)  | 23 (8.2)      | 13 (9.0)       | 1456 (22.0)   | 894 (26.0)    |
| Hypertension (%)                            | 14083 (6.9)   | 15377 (34.6)   | 494879 (25.5) | 225633 (55.2) | 90 (32.0)     | 97 (67.4)      | 3793 (57.3)   | 2808 (81.6)   |
| Peripheral arterial disease (%)             | 566 (0.3)     | 1490 (3.3)     | 24278 (1.2)   | 15624 (3.8)   | 5 (1.8)       | 28 (19.4)      | 234 (3.5)     | 280 (8.1)     |
| Chronic obstructive pulmonary disease (%)   | 1371 (0.7)    | 479 (1.1)      | 58952 (3.0)   | 20766 (5.1)   | 11 (3.9)      | 10 (6.9)       | 896 (13.5)    | 444 (12.9)    |
| Dementia (%)                                | 377 (0.2)     | 239 (0.5)      | 29038 (1.5)   | 10608 (2.6)   | 6 (2.1)       | 4 (2.8)        | 471 (7.1)     | 226 (6.6)     |
| Asthma (%)                                  | 11144 (5.4)   | 2946 (6.6)     | 81986 (4.2)   | 26519 (6.5)   | 34 (12.1)     | 19 (13.2)      | 745 (11.3)    | 417 (12.1)    |
| Alcoholism (%)                              | 7931 (3.9)    | 2641 (5.9)     | 63959 (3.3)   | 16614 (4.1)   | 19 (6.8)      | 10 (6.9)       | 394 (6.0)     | 171 (5.0)     |
| Substance abuse (%)                         | 11282 (8.0)   | 3706 (8.4)     | 97477 (6.2)   | 28721 (7.5)   | 35 (12.5)     | 20 (13.9)      | 619 (9.4)     | 297 (8.6)     |
| Schizophrenia (%)                           | 2170 (1.5)    | 398 (0.9)      | 19750 (1.2)   | 8883 (2.3)    | 13 (4.6)      | 1 (0.7)        | 160 (2.4)     | 80 (2.3)      |
| Renal disease (%)                           | 1543 (0.8)    | 5417 (12.2)    | 44482 (2.3)   | 34392 (8.4)   | 19 (6.8)      | 53 (36.8)      | 1064 (16.1)   | 990 (28.8)    |
| Cancer (%)                                  | 10462 (5.1)   | 2683 (6.0)     | 337861 (17.4) | 80830 (19.8)  | 37 (13.2)     | 18 (12.5)      | 1733 (26.2)   | 885 (25.7)    |
| Antihypertensive medication (%)             | 30307 (14.8)  | 17170 (38.6)   | 845671 (43.5) | 315383 (77.2) | 107 (38.1)    | 92 (63.9)      | 4066 (61.4)   | 2823 (82.0)   |
| Statins (%)                                 | 13242 (6.5)   | 18587 (41.8)   | 436510 (22.5) | 268479 (65.7) | 54 (19.2)     | 79 (54.9)      | 2178 (32.9)   | 2294 (66.6)   |
| Anticoagulant medication (%)                | 5231 (2.6)    | 1597 (3.6)     | 187878 (9.7)  | 63282 (15.5)  | 49 (17.4)     | 23 (16.0)      | 1754 (26.5)   | 1010 (29.3)   |
| Antithrombotic medication (%)               | 7196 (3.5)    | 6717 (15.1)    | 278958 (14.4) | 125562 (30.7) | 33 (11.7)     | 58 (40.3)      | 1718 (26.0)   | 1347 (39.1)   |
| Age of onset of disease (%)                 |               | 17.64 (10.26)  |               | 56.90 (13.24) |               | 19.73 (10.06)  |               | 57.18 (13.71) |
| Duration of diabetes (SD)                   |               | 13.65 (11.85)  |               | 3.14 (5.32)   |               | 20.89 (14.44)  |               | 4.59 (6.95)   |
| Glycated hemoglobin (HbA1c) (SD)            |               | 65.31 (17.31)  |               | 55.34 (17.65) |               | 68.44 (16.53)  |               | 56.79 (17.68) |
| Glycated hemoglobin categories (%)          |               |                |               |               |               |                |               |               |
| HbA1c < 48 mmol/mol                         |               | 5494 (13.1)    |               | 143643 (39.1) |               | 9 (6.7)        |               | 1007 (33.7)   |
| HbA1c >= 48 & HbA1c <= 53 mmol/mol          |               | 4887 (11.6)    |               | 81204 (22.1)  |               | 12 (9.0)       |               | 647 (21.7)    |
| HbA1c >= 54 & HbA1c <= 58 mmol/mol          |               | 5295 (12.6)    |               | 39705 (10.8)  |               | 19 (14.2)      |               | 381 (12.8)    |
| HbA1c >= 59 & HbA1c <= 74 mmol/mol          |               | 15963 (38.1)   |               | 57888 (15.8)  |               | 52 (38.8)      |               | 548 (18.4)    |
| HbA1c >= 75 & HbA1c <= 85 mmol/mol          |               | 5622 (13.4)    |               | 17768 (4.8)   |               | 25 (18.7)      |               | 177 (5.9)     |
| HbA1c >= 86 mmol/mol                        |               | 4689 (11.2)    |               | 27228 (7.4)   |               | 17 (12.7)      |               | 224 (7.5)     |
| Smoking (%)                                 |               | 5624 (14.3)    |               | 52348 (16.8)  |               | 23 (18.0)      |               | 348 (14.4)    |
| Albuminuria (%)                             |               |                |               |               |               |                |               |               |
| Macroalbuminuria (>30)                      |               | 1138 (4.0)     |               | 8987 (4.1)    |               | 10 (10.2)      |               | 119 (6.5)     |
| Microalbuminuria (3-30)                     |               | 2512 (8.9)     |               | 27063 (12.5)  |               | 20 (20.4)      |               | 368 (20.1)    |
| No albuminuria                              |               | 24594 (86.9)   |               | 179514 (82.9) |               | 68 (69.4)      |               | 1334 (73.0)   |
| Normalized value                            |               | 65 (0.2)       |               | 1007 (0.5)    |               | 0 (0.0)        |               | 6 (0.3)       |
| Estimated glomerular filtration rate (SD)   |               | 101.52 (29.51) |               | 85.96 (24.74) |               | 100.11 (33.17) |               | 83.68 (27.05) |



|                                                    |                |                |                |                |
|----------------------------------------------------|----------------|----------------|----------------|----------------|
| <b>Retinopathy (%)</b>                             | 4553 (28.4)    | 18581 (17.5)   | 17 ( 45.9)     | 213 ( 26.5)    |
| <b>Systolic blood pressure (SD)</b>                | 123.25 (14.71) | 136.53 (16.83) | 131.18 (17.04) | 137.44 (18.50) |
| <b>Diastolic blood pressure (SD)</b>               | 73.23 (8.91)   | 79.94 (9.96)   | 75.83 (8.08)   | 79.79 (10.19)  |
| <b>Total-cholesterol (SD)</b>                      | 4.61 (1.00)    | 5.10 (1.18)    | 4.89 (1.11)    | 5.02 (1.24)    |
| <b>High-density lipoprotein cholesterol (SD)</b>   | 1.35 (0.31)    | 1.24 (0.30)    | 1.30 (0.24)    | 1.22 (0.30)    |
| <b>Triglycerides (SD)</b>                          | 1.14 (0.94)    | 2.05 (1.62)    | 1.66 (1.15)    | 2.06 (1.45)    |
| <b>Physical activity (%)</b>                       |                |                |                |                |
| <b>&lt; 1/week</b>                                 | 2247 (14.0)    | 31595 (13.5)   | 6 ( 19.4)      | 240 ( 14.8)    |
| <b>Daily</b>                                       | 3660 (22.8)    | 71576 (30.6)   | 8 ( 25.8)      | 440 ( 27.2)    |
| <b>Never</b>                                       | 1148 ( 7.1)    | 29346 (12.6)   | 4 ( 12.9)      | 299 ( 18.5)    |
| <b>Regularly 1-2/week</b>                          | 3666 (22.8)    | 47907 (20.5)   | 7 ( 22.6)      | 319 ( 19.7)    |
| <b>Regularly 3-5/week</b>                          | 5344 (33.3)    | 53297 (22.8)   | 6 ( 19.4)      | 319 ( 19.7)    |
| <b>Insulin treatment method = insulin pump (%)</b> | 4576 (19.4)    | 151 ( 0.4)     | 7 ( 12.7)      | 0 ( 0.0)       |
| <b>LDL-cholesterol (SD)</b>                        | 2.61 (0.83)    | 3.00 (1.00)    | 2.80 (1.08)    | 2.92 (1.01)    |
| <b>S-creatinine (SD)</b>                           | 73.00 (29.24)  | 74.96 (22.30)  | 72.81 (21.11)  | 79.25 (31.54)  |
| <b>Body mass index (SD)</b>                        | 24.77 (6.27)   | 30.84 (7.47)   | 26.84 (7.41)   | 31.12 (6.91)   |

**Supplementary Table S3: Baseline characteristics for patients with diabetes and matched controls that were admitted to intensive care due to covid-19**

|                                             | T1D Ctrl      | T1D           | T2D Ctrl      | T2D           | T1D Ctrl ICU  | T1D ICU       | T2D Ctrl ICU | T2D ICU       |
|---------------------------------------------|---------------|---------------|---------------|---------------|---------------|---------------|--------------|---------------|
| Number of study participants (n)            | 204878        | 44618         | 1947994       | 411528        | 41            | 21            | 906          | 448           |
| Sex = women (%)                             | 91141 (44.5)  | 19504 (43.7)  | 890641 (45.7) | 182537 (44.4) | 9 (22.0)      | 10 (47.6)     | 198 (21.9)   | 115 (25.7)    |
| Age (SD)                                    | 40.49 (15.42) | 42.60 (16.56) | 63.37 (12.21) | 66.05 (13.25) | 53.71 (12.67) | 47.33 (15.45) | 63.45 (9.18) | 59.91 (10.39) |
| Education (%)                               |               |               |               |               |               |               |              |               |
| Pre-secondary education                     | 33501 (16.4)  | 7818 (17.5)   | 453061 (23.3) | 139093 (33.8) | 7 (17.1)      | 7 (33.3)      | 273 (30.1)   | 144 (32.1)    |
| Secondary education                         | 94580 (46.2)  | 21063 (47.2)  | 864169 (44.4) | 185132 (45.0) | 25 (61.0)     | 10 (47.6)     | 382 (42.2)   | 206 (46.0)    |
| Post-secondary education                    | 76797 (37.5)  | 15737 (35.3)  | 630764 (32.4) | 87303 (21.2)  | 9 (22.0)      | 4 (19.0)      | 251 (27.7)   | 98 (21.9)     |
| Marital status = Not married (%)            | 133866 (65.3) | 28720 (64.4)  | 905832 (46.5) | 205818 (50.0) | 19 (46.3)     | 16 (76.2)     | 366 (40.4)   | 187 (41.7)    |
| Ethnicity = Not Scandinavia (%)             | 18099 (8.8)   | 2846 (6.4)    | 234778 (12.1) | 80712 (19.6)  | 9 (22.0)      | 3 (14.3)      | 319 (35.2)   | 219 (48.9)    |
| Income family interquartile range (IQR) (%) |               |               |               |               |               |               |              |               |
| IQR 1                                       | 32475 (15.9)  | 8182 (18.3)   | 462781 (23.8) | 141354 (34.3) | 11 (26.8)     | 10 (47.6)     | 242 (26.7)   | 149 (33.3)    |
| IQR 2                                       | 48540 (23.7)  | 11123 (24.9)  | 477060 (24.5) | 115509 (28.1) | 10 (24.4)     | 7 (33.3)      | 237 (26.2)   | 126 (28.1)    |
| IQR 3                                       | 55467 (27.1)  | 11737 (26.3)  | 494938 (25.4) | 90130 (21.9)  | 10 (24.4)     | 2 (9.5)       | 220 (24.3)   | 95 (21.2)     |
| IQR4                                        | 68396 (33.4)  | 13576 (30.4)  | 513215 (26.3) | 64535 (15.7)  | 10 (24.4)     | 2 (9.5)       | 207 (22.8)   | 78 (17.4)     |
| Income – family (IQR) (%)                   |               |               |               |               |               |               |              |               |
| IQR – family 1                              | 79415 (38.9)  | 17663 (39.7)  | 412576 (21.3) | 132335 (32.2) | 11 (26.8)     | 11 (55.0)     | 226 (24.9)   | 145 (32.4)    |
| IQR – family 2                              | 47185 (23.1)  | 10933 (24.6)  | 477930 (24.6) | 116155 (28.3) | 10 (24.4)     | 5 (25.0)      | 217 (24.0)   | 126 (28.2)    |
| IQR – family 3                              | 43677 (21.4)  | 9090 (20.4)   | 509794 (26.3) | 89711 (21.9)  | 11 (26.8)     | 2 (10.0)      | 227 (25.1)   | 100 (22.4)    |
| IQR – family 4                              | 33721 (16.5)  | 6806 (15.3)   | 539404 (27.8) | 72351 (17.6)  | 9 (22.0)      | 2 (10.0)      | 236 (26.0)   | 76 (17.0)     |
| Coronary heart disease (%)                  | 4250 (2.1)    | 3489 (7.8)    | 177976 (9.1)  | 85726 (20.8)  | 1 (2.4)       | 1 (4.8)       | 123 (13.6)   | 88 (19.6)     |
| Acute myocardial infarction (%)             | 2188 (1.1)    | 1735 (3.9)    | 85480 (4.4)   | 42533 (10.3)  | 1 (2.4)       | 1 (4.8)       | 67 (7.4)     | 48 (10.7)     |
| Stroke (%)                                  | 2122 (1.0)    | 1356 (3.0)    | 85069 (4.4)   | 35747 (8.7)   | 4 (9.8)       | 1 (4.8)       | 71 (7.8)     | 46 (10.3)     |
| Heart failure (%)                           | 1940 (0.9)    | 1471 (3.3)    | 82046 (4.2)   | 44165 (10.7)  | 1 (2.4)       | 3 (14.3)      | 92 (10.2)    | 50 (11.2)     |
| Valvular disease (%)                        | 1193 (0.6)    | 528 (1.2)     | 43736 (2.2)   | 15264 (3.7)   | 0 (0.0)       | 0 (0.0)       | 29 (3.2)     | 14 (3.1)      |
| Atrial fibrillation (%)                     | 3664 (1.8)    | 1211 (2.7)    | 155206 (8.0)  | 56463 (13.7)  | 3 (7.3)       | 1 (4.8)       | 146 (16.1)   | 59 (13.2)     |
| Hypertension (%)                            | 14160 (6.9)   | 15464 (34.7)  | 498202 (25.6) | 228104 (55.4) | 13 (31.7)     | 10 (47.6)     | 470 (51.9)   | 337 (75.2)    |
| Peripheral arterial disease (%)             | 571 (0.3)     | 1518 (3.4)    | 24499 (1.3)   | 15889 (3.9)   | 0 (0.0)       | 0 (0.0)       | 13 (1.4)     | 15 (3.3)      |
| Chronic obstructive pulmonary disease (%)   | 1382 (0.7)    | 489 (1.1)     | 59772 (3.1)   | 21183 (5.1)   | 0 (0.0)       | 0 (0.0)       | 76 (8.4)     | 27 (6.0)      |
| Dementia (%)                                | 383 (0.2)     | 243 (0.5)     | 29504 (1.5)   | 10832 (2.6)   | 0 (0.0)       | 0 (0.0)       | 5 (0.6)      | 2 (0.4)       |
| Asthma (%)                                  | 11175 (5.5)   | 2963 (6.6)    | 82620 (4.2)   | 26881 (6.5)   | 3 (7.3)       | 2 (9.5)       | 111 (12.3)   | 55 (12.3)     |
| Alcoholism (%)                              | 7948 (3.9)    | 2650 (5.9)    | 64313 (3.3)   | 16764 (4.1)   | 2 (4.9)       | 1 (4.8)       | 40 (4.4)     | 21 (4.7)      |
| Substance abuse (%)                         | 11312 (8.0)   | 3724 (8.4)    | 98032 (6.2)   | 28983 (7.5)   | 5 (12.2)      | 2 (9.5)       | 64 (7.1)     | 35 (7.8)      |
| Schizophrenia (%)                           | 2180 (1.5)    | 399 (0.9)     | 19898 (1.3)   | 8954 (2.3)    | 3 (7.3)       | 0 (0.0)       | 12 (1.3)     | 9 (2.0)       |
| Renal disease (%)                           | 1554 (0.8)    | 5464 (12.2)   | 45314 (2.3)   | 35248 (8.6)   | 8 (19.5)      | 6 (28.6)      | 232 (25.6)   | 134 (29.9)    |
| Cancer (%)                                  | 10491 (5.1)   | 2700 (6.1)    | 339457 (17.4) | 81647 (19.8)  | 8 (19.5)      | 1 (4.8)       | 137 (15.1)   | 68 (15.2)     |
| Antihypertensive medication (%)             | 30403 (14.8)  | 17255 (38.7)  | 849234 (43.6) | 317861 (77.2) | 11 (26.8)     | 7 (33.3)      | 503 (55.5)   | 345 (77.0)    |
| Statins (%)                                 | 13293 (6.5)   | 18657 (41.8)  | 438418 (22.5) | 270475 (65.7) | 3 (7.3)       | 9 (42.9)      | 270 (29.8)   | 298 (66.5)    |
| Anticoagulant medication (%)                | 5272 (2.6)    | 1619 (3.6)    | 189477 (9.7)  | 64218 (15.6)  | 8 (19.5)      | 1 (4.8)       | 155 (17.1)   | 74 (16.5)     |
| Antithrombotic medication (%)               | 7225 (3.5)    | 6769 (15.2)   | 280516 (14.4) | 126774 (30.8) | 4 (9.8)       | 6 (28.6)      | 160 (17.7)   | 135 (30.1)    |
| Age of onset of disease (%)                 |               | 17.65 (10.26) |               | 56.91 (13.25) |               | 14.80 (8.88)  |              | 51.28 (11.00) |
| Duration of diabetes (SD)                   |               | 13.67 (11.87) |               | 3.15 (5.34)   |               | 20.45 (14.53) |              | 3.35 (5.04)   |
| Glycated hemoglobin (HbA1c) (SD)            |               | 65.32 (17.31) |               | 55.35 (17.64) |               | 72.55 (16.04) |              | 60.01 (20.60) |
| Glycated hemoglobin categories (%)          |               |               |               |               |               |               |              |               |
| HbA1c < 48 mmol/mol                         |               | 5502 (13.1)   |               | 144531 (39.1) |               | 1 (5.0)       |              | 119 (30.2)    |
| HbA1c >= 48 & HbA1c <= 53 mmol/mol          |               | 4898 (11.6)   |               | 81779 (22.1)  |               | 1 (5.0)       |              | 72 (18.3)     |
| HbA1c >= 54 & HbA1c <= 58 mmol/mol          |               | 5313 (12.6)   |               | 40034 (10.8)  |               | 1 (5.0)       |              | 52 (13.2)     |
| HbA1c >= 59 & HbA1c <= 74 mmol/mol          |               | 16007 (38.1)  |               | 58357 (15.8)  |               | 8 (40.0)      |              | 79 (20.1)     |
| HbA1c >= 75 & HbA1c <= 85 mmol/mol          |               | 5641 (13.4)   |               | 17922 (4.8)   |               | 6 (30.0)      |              | 23 (5.8)      |
| HbA1c >= 86 mmol/mol                        |               | 4703 (11.2)   |               | 27403 (7.4)   |               | 3 (15.0)      |              | 49 (12.4)     |
| Smoking (%)                                 |               | 5646 (14.3)   |               | 52659 (16.8)  |               | 1 (5.0)       |              | 37 (11.1)     |
| Albuminuria (%)                             |               |               |               |               |               |               |              |               |
| Macroalbuminuria (>30)                      |               | 1148 (4.0)    |               | 9086 (4.2)    |               | 0 (0.0)       |              | 20 (8.4)      |
| Microalbuminuria (3-30)                     |               | 2529 (8.9)    |               | 27378 (12.5)  |               | 3 (21.4)      |              | 53 (22.2)     |
| No albuminuria                              |               | 24651 (86.8)  |               | 180683 (82.8) |               | 11 (78.6)     |              | 165 (69.0)    |
| Normalized value                            |               | 65 (0.2)      |               | 1012 (0.5)    |               | 0 (0.0)       |              | 1 (0.4)       |

|                                                    |  |                |  |                |  |                |  |                |
|----------------------------------------------------|--|----------------|--|----------------|--|----------------|--|----------------|
| <b>Estimated glomerular filtration rate (SD)</b>   |  | 101.51 (29.51) |  | 85.94 (24.76)  |  | 116.35 (56.37) |  | 92.05 (27.46)  |
| <b>Retinopathy (%)</b>                             |  | 4569 (28.5)    |  | 18760 (17.6)   |  | 1 ( 25.0)      |  | 34 ( 28.3)     |
| <b>Systolic blood pressure (SD)</b>                |  | 123.27 (14.72) |  | 136.54 (16.85) |  | 123.21 (12.01) |  | 135.30 (16.61) |
| <b>Diastolic blood pressure (SD)</b>               |  | 73.24 (8.91)   |  | 79.94 (9.96)   |  | 72.84 (7.98)   |  | 81.77 (10.35)  |
| <b>Total-cholesterol (SD)</b>                      |  | 4.61 (1.00)    |  | 5.10 (1.18)    |  | 4.73 (0.52)    |  | 5.16 (1.30)    |
| <b>High-density lipoprotein cholesterol (SD)</b>   |  | 1.35 (0.31)    |  | 1.24 (0.30)    |  | 1.30 (0.27)    |  | 1.18 (0.28)    |
| <b>Triglycerides (SD)</b>                          |  | 1.15 (0.94)    |  | 2.04 (1.62)    |  | 1.05 (0.48)    |  | 2.44 (2.21)    |
| <b>Physical activity (%)</b>                       |  |                |  |                |  |                |  |                |
| <b>&lt; 1/week</b>                                 |  | 2253 (14.0)    |  | 31792 (13.5)   |  | 0 ( 0.0)       |  | 43 ( 17.8)     |
| <b>Daily</b>                                       |  | 3667 (22.8)    |  | 71947 (30.6)   |  | 1 ( 50.0)      |  | 69 ( 28.5)     |
| <b>Never</b>                                       |  | 1152 ( 7.2)    |  | 29613 (12.6)   |  | 0 ( 0.0)       |  | 32 ( 13.2)     |
| <b>Regularly 1-2/week</b>                          |  | 3673 (22.8)    |  | 48183 (20.5)   |  | 0 ( 0.0)       |  | 43 ( 17.8)     |
| <b>Regularly 3-5/week</b>                          |  | 5349 (33.2)    |  | 53561 (22.8)   |  | 1 ( 50.0)      |  | 55 ( 22.7)     |
| <b>Insulin treatment method = insulin pump (%)</b> |  | 4582 (19.4)    |  | 151 ( 0.4)     |  | 1 ( 14.3)      |  | 0 ( 0.0)       |
| <b>LDL-cholesterol (SD)</b>                        |  | 2.61 (0.83)    |  | 3.00 (1.00)    |  | 3.00 (0.50)    |  | 3.05 (1.09)    |
| <b>S-creatinine (SD)</b>                           |  | 73.01 (29.22)  |  | 74.99 (22.39)  |  | 66.25 (17.68)  |  | 76.96 (29.70)  |
| <b>Body mass index (SD)</b>                        |  | 24.78 (6.28)   |  | 30.84 (7.47)   |  | 28.33 (4.98)   |  | 32.35 (6.18)   |

## Supplementary Table S4: Baseline characteristics for patients with diabetes and matched controls that died due to covid-19

|                                             | T1D Ctrl      | T1D           | T2D Ctrl      | T2D           | T1D Ctrl death | T1D death     | T2D Ctrl death | T2D death     |
|---------------------------------------------|---------------|---------------|---------------|---------------|----------------|---------------|----------------|---------------|
| Number of study participants (n)            | 204900        | 44618         | 1947099       | 410822        | 19             | 21            | 1801           | 1154          |
| Sex = women (%)                             | 91147 (44.5)  | 19506 (43.7)  | 890029 (45.7) | 182179 (44.3) | 3 (15.8)       | 8 (38.1)      | 810 (45.0)     | 473 (41.0)    |
| Age (SD)                                    | 40.49 (15.41) | 42.59 (16.55) | 63.36 (12.21) | 66.01 (13.23) | 69.79 (10.78)  | 70.81 (8.47)  | 77.75 (8.76)   | 78.92 (9.91)  |
| Education (%)                               |               |               |               |               |                |               |                |               |
| Pre-secondary education                     | 33502 (16.4)  | 7817 (17.5)   | 452584 (23.2) | 138696 (33.8) | 6 (31.6)       | 8 (38.1)      | 750 (41.6)     | 541 (46.9)    |
| Secondary education                         | 94597 (46.2)  | 21064 (47.2)  | 863862 (44.4) | 184887 (45.0) | 8 (42.1)       | 9 (42.9)      | 689 (38.3)     | 451 (39.1)    |
| Post-secondary education                    | 76801 (37.5)  | 15737 (35.3)  | 630653 (32.4) | 87239 (21.2)  | 5 (26.3)       | 4 (19.0)      | 362 (20.1)     | 162 (14.0)    |
| Marital status = Not married (%)            | 133876 (65.3) | 28728 (64.4)  | 905165 (46.5) | 205315 (50.0) | 9 (47.4)       | 8 (38.1)      | 1033 (57.4)    | 690 (59.8)    |
| Ethnicity = Not Scandinavia (%)             | 18105 (8.8)   | 2847 (6.4)    | 234846 (12.1) | 80699 (19.6)  | 3 (15.8)       | 2 (9.5)       | 251 (13.9)     | 232 (20.1)    |
| Income family interquartile range (IQR) (%) |               |               |               |               |                |               |                |               |
| IQR 1                                       | 32480 (15.9)  | 8185 (18.3)   | 462213 (23.7) | 140937 (34.3) | 6 (31.6)       | 7 (33.3)      | 810 (45.0)     | 566 (49.0)    |
| IQR 2                                       | 48544 (23.7)  | 11121 (24.9)  | 476826 (24.5) | 115291 (28.1) | 6 (31.6)       | 9 (42.9)      | 471 (26.2)     | 344 (29.8)    |
| IQR 3                                       | 55474 (27.1)  | 11734 (26.3)  | 494863 (25.4) | 90071 (21.9)  | 3 (15.8)       | 5 (23.8)      | 295 (16.4)     | 154 (13.3)    |
| IQR4                                        | 68402 (33.4)  | 13578 (30.4)  | 513197 (26.4) | 64523 (15.7)  | 4 (21.1)       | 0 (0.0)       | 225 (12.5)     | 90 (7.8)      |
| Income – family (IQR) (%)                   |               |               |               |               |                |               |                |               |
| IQR – family 1                              | 79423 (38.9)  | 17664 (39.7)  | 412111 (21.3) | 131970 (32.2) | 3 (15.8)       | 10 (47.6)     | 691 (38.4)     | 510 (44.3)    |
| IQR – family 2                              | 47187 (23.1)  | 10928 (24.6)  | 477626 (24.6) | 115949 (28.3) | 8 (42.1)       | 10 (47.6)     | 521 (29.0)     | 332 (28.8)    |
| IQR – family 3                              | 43684 (21.4)  | 9091 (20.4)   | 509706 (26.3) | 89636 (21.9)  | 4 (21.1)       | 1 (4.8)       | 315 (17.5)     | 175 (15.2)    |
| IQR – family 4                              | 33726 (16.5)  | 6808 (15.3)   | 539368 (27.8) | 72292 (17.6)  | 4 (21.1)       | 0 (0.0)       | 272 (15.1)     | 135 (11.7)    |
| Coronary heart disease (%)                  | 4244 (2.1)    | 3482 (7.8)    | 177654 (9.1)  | 85337 (20.8)  | 7 (36.8)       | 8 (38.1)      | 445 (24.7)     | 477 (41.3)    |
| Acute myocardial infarction (%)             | 2183 (1.1)    | 1732 (3.9)    | 85330 (4.4)   | 42318 (10.3)  | 6 (31.6)       | 4 (19.0)      | 217 (12.0)     | 263 (22.8)    |
| Stroke (%)                                  | 2119 (1.0)    | 1352 (3.0)    | 84749 (4.4)   | 35493 (8.6)   | 7 (36.8)       | 5 (23.8)      | 391 (21.7)     | 300 (26.0)    |
| Heart failure (%)                           | 1938 (0.9)    | 1468 (3.3)    | 81712 (4.2)   | 43806 (10.7)  | 3 (15.8)       | 6 (28.6)      | 426 (23.7)     | 409 (35.4)    |
| Valvular disease (%)                        | 1192 (0.6)    | 528 (1.2)     | 43639 (2.2)   | 15163 (3.7)   | 1 (5.3)        | 0 (0.0)       | 126 (7.0)      | 115 (10.0)    |
| Atrial fibrillation (%)                     | 3661 (1.8)    | 1208 (2.7)    | 154816 (8.0)  | 56107 (13.7)  | 6 (31.6)       | 4 (19.0)      | 536 (29.8)     | 415 (36.0)    |
| Hypertension (%)                            | 14162 (6.9)   | 15454 (34.6)  | 497519 (25.6) | 227463 (55.4) | 11 (57.9)      | 20 (95.2)     | 1153 (64.0)    | 978 (84.7)    |
| Peripheral arterial disease (%)             | 569 (0.3)     | 1509 (3.4)    | 24413 (1.3)   | 15747 (3.8)   | 2 (10.5)       | 9 (42.9)      | 99 (5.5)       | 157 (13.6)    |
| Chronic obstructive pulmonary disease (%)   | 1380 (0.7)    | 487 (1.1)     | 59592 (3.1)   | 21064 (5.1)   | 2 (10.5)       | 2 (9.5)       | 256 (14.2)     | 146 (12.7)    |
| Dementia (%)                                | 379 (0.2)     | 238 (0.5)     | 28931 (1.5)   | 10557 (2.6)   | 4 (21.1)       | 5 (23.8)      | 578 (32.1)     | 277 (24.0)    |
| Asthma (%)                                  | 11178 (5.5)   | 2961 (6.6)    | 82588 (4.2)   | 26828 (6.5)   | 0 (0.0)        | 4 (19.0)      | 143 (7.9)      | 108 (9.4)     |
| Alcoholism (%)                              | 7949 (3.9)    | 2651 (5.9)    | 64236 (3.3)   | 16732 (4.1)   | 1 (5.3)        | 0 (0.0)       | 117 (6.5)      | 53 (4.6)      |
| Substance abuse (%)                         | 11315 (8.0)   | 3726 (8.4)    | 97926 (6.2)   | 28926 (7.5)   | 2 (10.5)       | 0 (0.0)       | 170 (9.5)      | 92 (8.0)      |
| Schizophrenia (%)                           | 2181 (1.5)    | 398 (0.9)     | 19839 (1.2)   | 8934 (2.3)    | 2 (10.5)       | 1 (4.8)       | 71 (4.0)       | 29 (2.5)      |
| Renal disease (%)                           | 1559 (0.8)    | 5460 (12.2)   | 45147 (2.3)   | 34979 (8.5)   | 3 (15.8)       | 10 (47.6)     | 399 (22.2)     | 403 (34.9)    |
| Cancer (%)                                  | 10491 (5.1)   | 2696 (6.0)    | 339018 (17.4) | 81332 (19.8)  | 8 (42.1)       | 5 (23.8)      | 576 (32.0)     | 383 (33.2)    |
| Antihypertensive medication (%)             | 30402 (14.8)  | 17244 (38.6)  | 848537 (43.6) | 317226 (77.2) | 12 (63.2)      | 18 (85.7)     | 1200 (66.6)    | 980 (84.9)    |
| Statins (%)                                 | 13287 (6.5)   | 18651 (41.8)  | 438099 (22.5) | 270115 (65.7) | 9 (47.4)       | 15 (71.4)     | 589 (32.7)     | 658 (57.0)    |
| Anticoagulant medication (%)                | 5271 (2.6)    | 1616 (3.6)    | 189106 (9.7)  | 63896 (15.6)  | 9 (47.4)       | 4 (19.0)      | 526 (29.2)     | 396 (34.3)    |
| Antithrombotic medication (%)               | 7222 (3.5)    | 6762 (15.2)   | 280072 (14.4) | 126368 (30.8) | 7 (36.8)       | 13 (61.9)     | 604 (33.5)     | 541 (46.9)    |
| Age of onset of disease (%)                 |               | 17.64 (10.26) |               | 56.88 (13.24) |                | 22.35 (10.28) |                | 64.13 (13.24) |
| Duration of diabetes (SD)                   |               | 13.66 (11.86) |               | 3.14 (5.33)   |                | 31.55 (10.21) |                | 6.15 (7.94)   |
| Glycated hemoglobin (HbA1c) (SD)            |               | 65.32 (17.31) |               | 55.35 (17.65) |                | 69.58 (13.21) |                | 55.63 (15.65) |
| Glycated hemoglobin categories (%)          |               |               |               |               |                |               |                |               |
| HbA1c < 48 mmol/mol                         |               | 5503 (13.1)   |               | 144315 (39.1) |                | 0 (0.0)       |                | 335 (33.3)    |
| HbA1c >= 48 & HbA1c <= 53 mmol/mol          |               | 4897 (11.6)   |               | 81624 (22.1)  |                | 2 (10.5)      |                | 227 (22.5)    |
| HbA1c >= 54 & HbA1c <= 58 mmol/mol          |               | 5313 (12.6)   |               | 39946 (10.8)  |                | 1 (5.3)       |                | 140 (13.9)    |
| HbA1c >= 59 & HbA1c <= 74 mmol/mol          |               | 16006 (38.1)  |               | 58236 (15.8)  |                | 9 (47.4)      |                | 200 (19.9)    |
| HbA1c >= 75 & HbA1c <= 85 mmol/mol          |               | 5642 (13.4)   |               | 17896 (4.8)   |                | 5 (26.3)      |                | 49 (4.9)      |
| HbA1c >= 86 mmol/mol                        |               | 4704 (11.2)   |               | 27396 (7.4)   |                | 2 (10.5)      |                | 56 (5.6)      |
| Smoking (%)                                 |               | 5643 (14.3)   |               | 52596 (16.8)  |                | 4 (21.1)      |                | 100 (12.1)    |
| Albuminuria (%)                             |               |               |               |               |                |               |                |               |
| Macroalbuminuria (>30)                      |               | 1146 (4.0)    |               | 9060 (4.2)    |                | 2 (16.7)      |                | 46 (7.3)      |
| Microalbuminuria (3-30)                     |               | 2529 (8.9)    |               | 27306 (12.5)  |                | 3 (25.0)      |                | 125 (19.7)    |
| No albuminuria                              |               | 24655 (86.8)  |               | 180387 (82.8) |                | 7 (58.3)      |                | 461 (72.7)    |
| Normalized value                            |               | 65 (0.2)      |               | 1011 (0.5)    |                | 0 (0.0)       |                | 2 (0.3)       |

|                                                    |  |                |  |                |  |                |  |                |
|----------------------------------------------------|--|----------------|--|----------------|--|----------------|--|----------------|
| <b>Estimated glomerular filtration rate (SD)</b>   |  | 101.52 (29.52) |  | 85.97 (24.75)  |  | 68.10 (23.66)  |  | 74.01 (24.87)  |
| <b>Retinopathy (%)</b>                             |  | 4568 (28.5)    |  | 18712 (17.5)   |  | 2 (66.7)       |  | 82 (27.8)      |
| <b>Systolic blood pressure (SD)</b>                |  | 123.26 (14.72) |  | 136.52 (16.84) |  | 142.95 (15.69) |  | 141.19 (17.69) |
| <b>Diastolic blood pressure (SD)</b>               |  | 73.24 (8.91)   |  | 79.95 (9.96)   |  | 75.81 (8.38)   |  | 78.05 (10.02)  |
| <b>Total-cholesterol (SD)</b>                      |  | 4.61 (1.00)    |  | 5.10 (1.18)    |  | 4.54 (0.80)    |  | 4.92 (1.11)    |
| <b>High-density lipoprotein cholesterol (SD)</b>   |  | 1.35 (0.31)    |  | 1.24 (0.30)    |  | 1.42 (0.35)    |  | 1.26 (0.31)    |
| <b>Triglycerides (SD)</b>                          |  | 1.15 (0.94)    |  | 2.05 (1.62)    |  | 1.04 (0.52)    |  | 1.90 (1.10)    |
| <b>Physical activity (%)</b>                       |  |                |  |                |  |                |  |                |
| <b>&lt; 1/week</b>                                 |  | 2253 (14.0)    |  | 31769 (13.5)   |  | 0 (0.0)        |  | 66 (12.3)      |
| <b>Daily</b>                                       |  | 3667 (22.8)    |  | 71860 (30.6)   |  | 1 (50.0)       |  | 156 (29.1)     |
| <b>Never</b>                                       |  | 1152 (7.2)     |  | 29535 (12.6)   |  | 0 (0.0)        |  | 110 (20.5)     |
| <b>Regularly 1-2/week</b>                          |  | 3673 (22.8)    |  | 48122 (20.5)   |  | 0 (0.0)        |  | 104 (19.4)     |
| <b>Regularly 3-5/week</b>                          |  | 5349 (33.2)    |  | 53515 (22.8)   |  | 1 (50.0)       |  | 101 (18.8)     |
| <b>Insulin treatment method = insulin pump (%)</b> |  | 4583 (19.4)    |  | 151 (0.4)      |  | 0 (0.0)        |  | 0 (0.0)        |
| <b>LDL-cholesterol (SD)</b>                        |  | 2.61 (0.83)    |  | 3.00 (1.01)    |  | 2.11 (0.69)    |  | 2.83 (0.96)    |
| <b>S-creatinine (SD)</b>                           |  | 73.00 (29.22)  |  | 74.97 (22.35)  |  | 79.00 (23.24)  |  | 85.22 (32.49)  |
| <b>Body mass index (SD)</b>                        |  | 24.78 (6.28)   |  | 30.85 (7.47)   |  | 25.95 (3.54)   |  | 29.85 (5.94)   |

**Supplementary Table S5: Incidence rates for hospitalization of covid-19 infection among patients with diabetes and controls, according to age-categories**

Supplementary Table. Incidence for hospitalization of covid-19 in patients with T2D

| Subgroup | Numerator | Denominator | Crude Rate (per 1000) | 95% LCL (Crude) | 95% UCL (Crude) | Std Rate (per 1000) | 95% LCL (Std) | 95% UCL (Std) |
|----------|-----------|-------------|-----------------------|-----------------|-----------------|---------------------|---------------|---------------|
| <45      | 159       | 17356       | 9.16                  | 7.79            | 10.70           | 9.10                | 7.74          | 10.64         |
| 45-54    | 390       | 36150       | 10.79                 | 9.74            | 11.91           | 10.69               | 9.64          | 11.83         |
| 55-64    | 656       | 60450       | 10.85                 | 10.04           | 11.72           | 10.51               | 9.71          | 11.36         |
| 65-74    | 905       | 83436       | 10.85                 | 10.15           | 11.58           | 10.59               | 9.90          | 11.31         |
| >75      | 1333      | 75522       | 17.65                 | 16.72           | 18.62           | 17.48               | 16.55         | 18.46         |

Supplementary Table. Incidence for hospitalization of covid-19 in T2D matched controls

| Subgroup | Numerator | Denominator | Crude Rate (per 1000) | 95% LCL (Crude) | 95% UCL (Crude) | Std Rate (per 1000) | 95% LCL (Std) | 95% UCL (Std) |
|----------|-----------|-------------|-----------------------|-----------------|-----------------|---------------------|---------------|---------------|
| <45      | 191       | 94704       | 2.02                  | 1.74            | 2.32            | 2.01                | 1.73          | 2.31          |
| 45-54    | 655       | 197494      | 3.32                  | 3.07            | 3.58            | 3.16                | 2.92          | 3.42          |
| 55-64    | 1552      | 345620      | 4.49                  | 4.27            | 4.72            | 4.27                | 4.06          | 4.50          |
| 65-74    | 1990      | 430299      | 4.62                  | 4.42            | 4.83            | 4.54                | 4.34          | 4.74          |
| >75      | 2230      | 226123      | 9.86                  | 9.46            | 10.28           | 9.96                | 9.55          | 10.38         |

Supplementary Table. Incidence for hospitalization of covid-19 in T1D matched controls

| Subgroup | Numerator | Denominator | Crude Rate (per 1000) | 95% LCL (Crude) | 95% UCL (Crude) | Std Rate (per 1000) | 95% LCL (Std) | 95% UCL (Std) |
|----------|-----------|-------------|-----------------------|-----------------|-----------------|---------------------|---------------|---------------|
| <45      | 91        | 82752       | 1.10                  | 0.89            | 1.35            | 1.11                | 0.89          | 1.36          |
| 45-54    | 75        | 25781       | 2.91                  | 2.29            | 3.65            | 2.77                | 2.17          | 3.47          |
| 55-64    | 57        | 16790       | 3.39                  | 2.57            | 4.40            | 3.36                | 2.54          | 4.35          |
| 65-74    | 45        | 9173        | 4.91                  | 3.58            | 6.56            | 4.92                | 3.59          | 6.59          |
| >75      | 13        | 1724        | 7.54                  | 4.02            | 12.89           | 7.52                | 4.00          | 12.87         |

Supplementary Table. Incidence for hospitalization of covid-19 in T1D matched controls

| Subgroup | Numerator | Denominator | Crude Rate (per 1000) | 95% LCL (Crude) | 95% UCL (Crude) | Std Rate (per 1000) | 95% LCL (Std) | 95% UCL (Std) |
|----------|-----------|-------------|-----------------------|-----------------|-----------------|---------------------|---------------|---------------|
| <45      | 91        | 82752       | 1.10                  | 0.89            | 1.35            | 1.11                | 0.89          | 1.36          |
| 45-54    | 75        | 25781       | 2.91                  | 2.29            | 3.65            | 2.77                | 2.17          | 3.47          |
| 55-64    | 57        | 16790       | 3.39                  | 2.57            | 4.40            | 3.36                | 2.54          | 4.35          |
| 65-74    | 45        | 9173        | 4.91                  | 3.58            | 6.56            | 4.92                | 3.59          | 6.59          |
| >75      | 13        | 1724        | 7.54                  | 4.02            | 12.89           | 7.52                | 4.00          | 12.87         |

**Figure legend:**

T1D denotes Type 1 diabetes

T2D denotes Type 2 diabetes

## Supplementary Table S6: Incidence rates for admission to intensive care of covid-19 infection among patients with diabetes and controls, according to age-categories

Supplementary Table S6.1. Incidence for ICU-care in T2D

| Subgroup | Numerator | Denominator | Crude Rate (per 1000) | 95% LCL (Crude) | 95% UCL (Crude) | Std Rate (per 1000) | 95% LCL (Std) | 95% UCL (Std) |
|----------|-----------|-------------|-----------------------|-----------------|-----------------|---------------------|---------------|---------------|
| <45      | 33        | 17398       | 1.90                  | 1.31            | 2.66            | 1.88                | 1.30          | 2.65          |
| 45-54    | 94        | 36249       | 2.59                  | 2.10            | 3.17            | 2.48                | 1.99          | 3.05          |
| 55-64    | 153       | 60615       | 2.52                  | 2.14            | 2.96            | 2.38                | 2.02          | 2.80          |
| 65-74    | 139       | 83684       | 1.66                  | 1.40            | 1.96            | 1.56                | 1.31          | 1.84          |
| >75      | 29        | 75942       | 0.38                  | 0.26            | 0.55            | 0.35                | 0.23          | 0.50          |

Supplementary Table S6.2 Incidence matched controls T2D

| Subgroup | Numerator | Denominator | Crude Rate (per 1000) | 95% LCL (Crude) | 95% UCL (Crude) | Std Rate (per 1000) | 95% LCL (Std) | 95% UCL (Std) |
|----------|-----------|-------------|-----------------------|-----------------|-----------------|---------------------|---------------|---------------|
| <45      | 27        | 94757       | 0.28                  | 0.19            | 0.41            | 0.28                | 0.19          | 0.41          |
| 45-54    | 117       | 197669      | 0.59                  | 0.49            | 0.71            | 0.53                | 0.43          | 0.63          |
| 55-64    | 347       | 346006      | 1.00                  | 0.90            | 1.11            | 0.91                | 0.81          | 1.01          |
| 65-74    | 312       | 430833      | 0.72                  | 0.65            | 0.81            | 0.70                | 0.62          | 0.78          |
| >75      | 103       | 226804      | 0.45                  | 0.37            | 0.55            | 0.47                | 0.38          | 0.57          |

Supplementary Table S6.3. Incidence for ICU-care in T1D

| Subgroup | Numerator | Denominator | Crude Rate (per 1000) | 95% LCL (Crude) | 95% UCL (Crude) | Std Rate (per 1000) | 95% LCL (Std) | 95% UCL (Std) |
|----------|-----------|-------------|-----------------------|-----------------|-----------------|---------------------|---------------|---------------|
| <45      | 6         | 16593       | 0.36                  | 0.13            | 0.79            | 0.36                | 0.13          | 0.78          |
| 45-54    | 5         | 5502        | 0.91                  | 0.30            | 2.12            | 0.94                | 0.30          | 2.20          |
| 55-64    | 8         | 3978        | 2.01                  | 0.87            | 3.96            | 2.04                | 0.87          | 4.03          |
| 65-74    | 2         | 2782        | 0.72                  | 0.09            | 2.60            | 0.73                | 0.09          | 2.64          |
| >75      | 0         | 831         | 0.00                  | NaN             | NaN             | 0.00                | NaN           | NaN           |

Supplementary Table S6.4. Incidence for ICU-care in T1D matched controls

| Subgroup | Numerator | Denominator | Crude Rate (per 1000) | 95% LCL (Crude) | 95% UCL (Crude) | Std Rate (per 1000) | 95% LCL (Std) | 95% UCL (Std) |
|----------|-----------|-------------|-----------------------|-----------------|-----------------|---------------------|---------------|---------------|
| <45      | 8         | 82778       | 0.10                  | 0.04            | 0.19            | 0.09                | 0.04          | 0.18          |
| 45-54    | 10        | 25801       | 0.39                  | 0.19            | 0.71            | 0.37                | 0.18          | 0.68          |
| 55-64    | 15        | 16804       | 0.89                  | 0.50            | 1.47            | 0.87                | 0.49          | 1.43          |
| 65-74    | 8         | 9185        | 0.87                  | 0.38            | 1.72            | 0.88                | 0.38          | 1.73          |
| >75      | 0         | 1728        | 0.00                  | NaN             | NaN             | 0.00                | NaN           | NaN           |

**Figure legend:**

T1D denotes Type 1 diabetes

T2D denotes Type 2 diabetes

**Supplementary Table S7: Incidence rates for mortality from covid-19 infection among patients with diabetes and controls, according to age-categories**

| Supplementary Table S7.1. Incidence for covid-19 related mortality in T1D |           |             |                       |                 |                 |                     |               |               |
|---------------------------------------------------------------------------|-----------|-------------|-----------------------|-----------------|-----------------|---------------------|---------------|---------------|
| Subgroup                                                                  | Numerator | Denominator | Crude Rate (per 1000) | 95% LCL (Crude) | 95% UCL (Crude) | Std Rate (per 1000) | 95% LCL (Std) | 95% UCL (Std) |
| <45                                                                       | 4         | 17408       | 0.23                  | 0.06            | 0.59            | 0.23                | 0.06          | 0.60          |
| 45-54                                                                     | 23        | 36272       | 0.63                  | 0.40            | 0.95            | 0.56                | 0.36          | 0.85          |
| 55-64                                                                     | 67        | 60647       | 1.10                  | 0.86            | 1.40            | 1.05                | 0.81          | 1.34          |
| 65-74                                                                     | 240       | 83653       | 2.87                  | 2.52            | 3.26            | 2.71                | 2.38          | 3.08          |
| >75                                                                       | 820       | 75686       | 10.83                 | 10.11           | 11.60           | 10.76               | 10.03         | 11.53         |

| Supplementary Table S7.2. Incidence for covid-19 related mortality in T2D matched controls |           |             |                       |                 |                 |                     |               |               |
|--------------------------------------------------------------------------------------------|-----------|-------------|-----------------------|-----------------|-----------------|---------------------|---------------|---------------|
| Subgroup                                                                                   | Numerator | Denominator | Crude Rate (per 1000) | 95% LCL (Crude) | 95% UCL (Crude) | Std Rate (per 1000) | 95% LCL (Std) | 95% UCL (Std) |
| <45                                                                                        | 5         | 94764       | 0.05                  | 0.02            | 0.12            | 0.05                | 0.02          | 0.12          |
| 45-54                                                                                      | 23        | 197702      | 0.12                  | 0.07            | 0.17            | 0.10                | 0.06          | 0.15          |
| 55-64                                                                                      | 103       | 346089      | 0.30                  | 0.24            | 0.36            | 0.27                | 0.22          | 0.33          |
| 65-74                                                                                      | 430       | 430801      | 1.00                  | 0.91            | 1.10            | 0.97                | 0.88          | 1.07          |
| >75                                                                                        | 1240      | 226437      | 5.48                  | 5.18            | 5.79            | 5.54                | 5.23          | 5.86          |

| Supplementary Table S7.3. Incidence for covid-19 related mortality in patients with T1D |           |             |                       |                 |                 |                     |               |               |
|-----------------------------------------------------------------------------------------|-----------|-------------|-----------------------|-----------------|-----------------|---------------------|---------------|---------------|
| Subgroup                                                                                | Numerator | Denominator | Crude Rate (per 1000) | 95% LCL (Crude) | 95% UCL (Crude) | Std Rate (per 1000) | 95% LCL (Std) | 95% UCL (Std) |
| <45                                                                                     | 0         | 16595       | 0.00                  | NaN             | NaN             | 0.00                | NaN           | NaN           |
| 45-54                                                                                   | 1         | 5503        | 0.18                  | 0.00            | 1.01            | 0.16                | 0.00          | 0.92          |
| 55-64                                                                                   | 3         | 3979        | 0.75                  | 0.16            | 2.20            | 0.79                | 0.16          | 2.33          |
| 65-74                                                                                   | 8         | 2781        | 2.88                  | 1.24            | 5.67            | 2.91                | 1.25          | 5.75          |
| >75                                                                                     | 9         | 829         | 10.86                 | 4.96            | 20.61           | 9.92                | 4.49          | 18.97         |

| Supplementary Table S7.4. Incidence for covid-19 related mortality in T1D matched controls |           |             |                       |                 |                 |                     |               |               |
|--------------------------------------------------------------------------------------------|-----------|-------------|-----------------------|-----------------|-----------------|---------------------|---------------|---------------|
| Subgroup                                                                                   | Numerator | Denominator | Crude Rate (per 1000) | 95% LCL (Crude) | 95% UCL (Crude) | Std Rate (per 1000) | 95% LCL (Std) | 95% UCL (Std) |
| <45                                                                                        | 0         | 82781       | 0.00                  | NaN             | NaN             | 0.00                | NaN           | NaN           |
| 45-54                                                                                      | 2         | 25803       | 0.08                  | 0.01            | 0.28            | 0.07                | 0.01          | 0.26          |
| 55-64                                                                                      | 3         | 16808       | 0.18                  | 0.04            | 0.52            | 0.18                | 0.04          | 0.51          |
| 65-74                                                                                      | 7         | 9185        | 0.76                  | 0.31            | 1.57            | 0.77                | 0.31          | 1.58          |
| >75                                                                                        | 7         | 1726        | 4.06                  | 1.63            | 8.36            | 4.24                | 1.70          | 8.75          |

**Figure legend:**

T1D denotes Type 1 diabetes

T2D denotes Type 2 diabetes



**Supplementary Table S8: Cox regression model for hospitalization of covid-19 in diabetes and controls**

| Characteristic                               | Type 1 diabetes |                     |         | Matched controls T1D |                     |         | Type 2 diabetes |                     |         | Matched controls T12D |                     |         |
|----------------------------------------------|-----------------|---------------------|---------|----------------------|---------------------|---------|-----------------|---------------------|---------|-----------------------|---------------------|---------|
|                                              | HR <sup>†</sup> | 95% CI <sup>†</sup> | p-value | HR <sup>†</sup>      | 95% CI <sup>†</sup> | p-value | HR <sup>†</sup> | 95% CI <sup>†</sup> | p-value | HR <sup>†</sup>       | 95% CI <sup>†</sup> | p-value |
| <b>Age-categories</b>                        |                 |                     |         |                      |                     |         |                 |                     |         |                       |                     |         |
| <45                                          | —               | —                   |         | —                    | —                   |         | —               | —                   |         | —                     | —                   |         |
| 45-54                                        | 2.00            | 1.10, 3.62          | 0.022   | 2.53                 | 1.79, 3.58          | <0.001  | 1.08            | 0.90, 1.31          | 0.4     | 1.63                  | 1.39, 1.92          | <0.001  |
| 55-64                                        | 3.21            | 1.74, 5.90          | <0.001  | 2.16                 | 1.45, 3.24          | <0.001  | 0.89            | 0.74, 1.07          | 0.2     | 1.83                  | 1.56, 2.13          | <0.001  |
| 65-74                                        | 3.00            | 1.54, 5.85          | 0.001   | 1.99                 | 1.23, 3.20          | 0.005   | 0.65            | 0.54, 0.78          | <0.001  | 1.33                  | 1.14, 1.55          | <0.001  |
| >75                                          | 3.96            | 1.83, 8.61          | <0.001  | 1.71                 | 0.84, 3.49          | 0.14    | 0.70            | 0.58, 0.84          | <0.001  | 1.67                  | 1.43, 1.96          | <0.001  |
| <b>Sex</b>                                   | 0.90            | 0.64, 1.28          | 0.6     | 0.72                 | 0.56, 0.93          | 0.013   | 0.78            | 0.72, 0.84          | <0.001  | 0.68                  | 0.64, 0.72          | <0.001  |
| <b>Income IQR</b>                            |                 |                     |         |                      |                     |         |                 |                     |         |                       |                     |         |
| IQR 1                                        | —               | —                   |         | —                    | —                   |         | —               | —                   |         | —                     | —                   |         |
| IQR 2                                        | 0.97            | 0.64, 1.50          | >0.9    | 0.83                 | 0.60, 1.15          | 0.3     | 0.84            | 0.77, 0.91          | <0.001  | 0.77                  | 0.72, 0.82          | <0.001  |
| IQR 3                                        | 0.92            | 0.56, 1.49          | 0.7     | 0.74                 | 0.52, 1.05          | 0.093   | 0.71            | 0.64, 0.79          | <0.001  | 0.69                  | 0.64, 0.75          | <0.001  |
| IQR4                                         | 0.57            | 0.30, 1.08          | 0.085   | 0.71                 | 0.48, 1.06          | 0.092   | 0.69            | 0.61, 0.77          | <0.001  | 0.67                  | 0.62, 0.72          | <0.001  |
| <b>Education</b>                             |                 |                     |         |                      |                     |         |                 |                     |         |                       |                     |         |
| Pre-secondary edu                            | —               | —                   |         | —                    | —                   |         | —               | —                   |         | —                     | —                   |         |
| Secondary edu                                | 0.69            | 0.46, 1.03          | 0.069   | 1.22                 | 0.88, 1.68          | 0.2     | 0.81            | 0.75, 0.88          | <0.001  | 0.84                  | 0.80, 0.90          | <0.001  |
| Post-secondary edu                           | 0.69            | 0.43, 1.13          | 0.14    | 0.83                 | 0.57, 1.22          | 0.3     | 0.88            | 0.80, 0.98          | 0.017   | 0.89                  | 0.83, 0.95          | <0.001  |
| <b>Marital status</b>                        |                 |                     |         |                      |                     |         |                 |                     |         |                       |                     |         |
| Married                                      | —               | —                   |         | —                    | —                   |         | —               | —                   |         | —                     | —                   |         |
| Not married                                  | 0.97            | 0.68, 1.38          | 0.9     | 0.97                 | 0.75, 1.25          | 0.8     | 0.91            | 0.85, 0.98          | 0.008   | 1.01                  | 0.96, 1.06          | 0.7     |
| <b>Coronary heart disease</b>                | 0.79            | 0.48, 1.31          | 0.4     | 0.81                 | 0.47, 1.40          | 0.5     | 1.05            | 0.97, 1.14          | 0.2     | 1.01                  | 0.94, 1.08          | 0.9     |
| <b>Stroke</b>                                | 0.96            | 0.53, 1.75          | >0.9    | 1.28                 | 0.72, 2.26          | 0.4     | 1.32            | 1.20, 1.45          | <0.001  | 1.32                  | 1.22, 1.43          | <0.001  |
| <b>Heart failure</b>                         | 2.04            | 1.20, 3.46          | 0.008   | 1.60                 | 0.92, 2.80          | 0.10    | 1.49            | 1.36, 1.64          | <0.001  | 1.50                  | 1.38, 1.62          | <0.001  |
| <b>Valvular disease</b>                      | 1.28            | 0.60, 2.71          | 0.5     | 0.88                 | 0.40, 1.93          | 0.7     | 1.03            | 0.90, 1.18          | 0.7     | 0.90                  | 0.81, 1.01          | 0.072   |
| <b>Atrial fibrillation</b>                   | 0.53            | 0.25, 1.11          | 0.090   | 0.48                 | 0.27, 0.84          | 0.010   | 0.91            | 0.81, 1.03          | 0.14    | 0.94                  | 0.86, 1.03          | 0.2     |
| <b>Hypertension</b>                          | 2.05            | 1.18, 3.55          | 0.010   | 2.95                 | 1.95, 4.45          | <0.001  | 3.04            | 2.73, 3.38          | <0.001  | 2.76                  | 2.57, 2.96          | <0.001  |
| <b>Peripheral arterial disease</b>           | 1.84            | 1.13, 3.00          | 0.014   | 1.26                 | 0.50, 3.16          | 0.6     | 1.15            | 1.01, 1.30          | 0.033   | 1.03                  | 0.90, 1.18          | 0.7     |
| <b>Chronic obstructive pulmonary disease</b> | 1.44            | 0.72, 2.90          | 0.3     | 1.19                 | 0.62, 2.29          | 0.6     | 1.52            | 1.37, 1.70          | <0.001  | 2.10                  | 1.94, 2.27          | <0.001  |
| <b>Asthma</b>                                | 1.96            | 1.19, 3.23          | 0.008   | 2.15                 | 1.48, 3.12          | <0.001  | 1.45            | 1.30, 1.62          | <0.001  | 1.76                  | 1.63, 1.91          | <0.001  |
| <b>Dementia</b>                              | 1.46            | 0.52, 4.09          | 0.5     | 3.93                 | 1.66, 9.28          | 0.002   | 1.73            | 1.50, 1.99          | <0.001  | 2.58                  | 2.34, 2.84          | <0.001  |
| <b>Alcohol</b>                               | 1.24            | 0.64, 2.39          | 0.5     | 1.32                 | 0.82, 2.12          | 0.3     | 0.93            | 0.80, 1.09          | 0.4     | 1.14                  | 1.03, 1.27          | 0.013   |
| <b>Renal disease</b>                         | 1.99            | 1.34, 2.95          | <0.001  | 2.42                 | 1.46, 4.02          | <0.001  | 2.53            | 2.34, 2.75          | <0.001  | 3.16                  | 2.94, 3.40          | <0.001  |
| <b>Cancer</b>                                | 0.94            | 0.56, 1.57          | 0.8     | 1.29                 | 0.89, 1.89          | 0.2     | 1.08            | 1.00, 1.17          | 0.049   | 1.16                  | 1.09, 1.23          | <0.001  |
| <b>Antihypertensive med</b>                  | 0.72            | 0.42, 1.24          | 0.2     | 0.95                 | 0.64, 1.41          | 0.8     | 0.61            | 0.55, 0.68          | <0.001  | 0.70                  | 0.66, 0.76          | <0.001  |
| <b>Statins</b>                               | 0.53            | 0.35, 0.81          | 0.003   | 0.96                 | 0.64, 1.42          | 0.8     | 0.89            | 0.82, 0.96          | 0.003   | 0.82                  | 0.77, 0.88          | <0.001  |
| <b>Anticoagulant med</b>                     | 2.76            | 1.55, 4.92          | <0.001  | 4.23                 | 2.83, 6.32          | <0.001  | 1.46            | 1.30, 1.64          | <0.001  | 1.79                  | 1.65, 1.94          | <0.001  |
| <b>Antithrombotic med</b>                    | 1.57            | 1.00, 2.46          | 0.049   | 1.13                 | 0.70, 1.81          | 0.6     | 1.10            | 1.01, 1.20          | 0.024   | 1.25                  | 1.17, 1.34          | <0.001  |

<sup>†</sup> HR = Hazard Ratio, CI = Confidence Interval

## Supplementary Table S9: Cox regression model for admission to intensive care due to covid-19 in diabetes and controls

| Characteristic                               | Type 1 diabetes |                     |         | Matched controls T1D |                     |         | Type 2 diabetes |                     |         | Matched controls T12D |                     |         |
|----------------------------------------------|-----------------|---------------------|---------|----------------------|---------------------|---------|-----------------|---------------------|---------|-----------------------|---------------------|---------|
|                                              | HR <sup>1</sup> | 95% CI <sup>1</sup> | p-value | HR <sup>1</sup>      | 95% CI <sup>1</sup> | p-value | HR <sup>1</sup> | 95% CI <sup>1</sup> | p-value | HR <sup>1</sup>       | 95% CI <sup>1</sup> | p-value |
| <b>Age</b>                                   | 1.04            | 1.00, 1.07          | 0.033   | 1.05                 | 1.02, 1.07          | <0.001  |                 |                     |         |                       |                     |         |
| <b>Sex</b>                                   | 1.09            | 0.44, 2.71          | 0.8     | 0.32                 | 0.15, 0.69          | 0.004   | 0.43            | 0.34, 0.54          | <0.001  | 0.72                  | 0.56, 0.93          | 0.013   |
| <b>Income IQR</b>                            |                 |                     |         |                      |                     |         |                 |                     |         |                       |                     |         |
| <i>IQR 1</i>                                 | —               | —                   |         | —                    | —                   |         | —               | —                   |         | —                     | —                   |         |
| <i>IQR 2</i>                                 | 0.62            | 0.20, 1.88          | 0.4     | 0.98                 | 0.40, 2.39          | >0.9    | 0.89            | 0.70, 1.14          | 0.4     | 0.83                  | 0.60, 1.15          | 0.3     |
| <i>IQR 3</i>                                 | 0.32            | 0.07, 1.58          | 0.2     | 0.90                 | 0.37, 2.18          | 0.8     | 0.74            | 0.57, 0.96          | 0.024   | 0.74                  | 0.52, 1.05          | 0.093   |
| <i>IQR 4</i>                                 | 0.46            | 0.09, 2.43          | 0.4     | 0.78                 | 0.29, 2.09          | 0.6     | 0.63            | 0.47, 0.86          | 0.003   | 0.71                  | 0.48, 1.06          | 0.092   |
| <b>Education</b>                             |                 |                     |         |                      |                     |         |                 |                     |         |                       |                     |         |
| Pre-secondary edu                            | —               | —                   |         | —                    | —                   |         | —               | —                   |         | —                     | —                   |         |
| Secondary edu                                | 0.78            | 0.27, 2.22          | 0.6     | 1.78                 | 0.73, 4.32          | 0.2     | 0.90            | 0.73, 1.12          | 0.4     | 1.22                  | 0.88, 1.68          | 0.2     |
| Post-secondary edu                           | 0.49            | 0.13, 1.88          | 0.3     | 0.90                 | 0.31, 2.61          | 0.8     | 0.97            | 0.74, 1.27          | 0.8     | 0.83                  | 0.57, 1.22          | 0.3     |
| <b>Marital status</b>                        |                 |                     |         |                      |                     |         |                 |                     |         |                       |                     |         |
| <i>Married</i>                               | —               | —                   |         |                      |                     |         | —               | —                   |         | —                     | —                   |         |
| Not married                                  | 1.83            | 0.63, 5.36          | 0.3     |                      |                     |         | 0.67            | 0.55, 0.81          | <0.001  | 0.97                  | 0.75, 1.25          | 0.8     |
| <b>Coronary heart disease</b>                | 0.11            | 0.01, 1.05          | 0.055   |                      |                     |         | 0.78            | 0.59, 1.03          | 0.085   | 0.81                  | 0.47, 1.40          | 0.5     |
| <b>Stroke</b>                                | 0.55            | 0.07, 4.53          | 0.6     | 2.86                 | 0.88, 9.31          | 0.080   | 1.19            | 0.86, 1.64          | 0.3     | 1.28                  | 0.72, 2.26          | 0.4     |
| <b>Heart failure</b>                         | 5.00            | 1.10, 22.7          | 0.037   | 0.40                 | 0.05, 3.38          | 0.4     | 0.79            | 0.56, 1.11          | 0.2     | 1.60                  | 0.92, 2.80          | 0.10    |
| <b>Atrial fibrillation</b>                   | 1.15            | 0.10, 13.6          | >0.9    | 0.47                 | 0.11, 2.04          | 0.3     | 0.90            | 0.61, 1.35          | 0.6     | 0.48                  | 0.27, 0.84          | 0.010   |
| <b>Hypertension</b>                          | 2.42            | 0.68, 8.69          | 0.2     | 3.86                 | 1.31, 11.3          | 0.014   | 3.60            | 2.75, 4.73          | <0.001  | 2.95                  | 1.95, 4.45          | <0.001  |
| <b>Asthma</b>                                | 1.48            | 0.34, 6.46          | 0.6     | 1.79                 | 0.55, 5.87          | 0.3     | 1.88            | 1.40, 2.52          | <0.001  | 2.15                  | 1.48, 3.12          | <0.001  |
| <b>Alcohol</b>                               | 0.68            | 0.09, 5.21          | 0.7     | 0.90                 | 0.21, 3.76          | 0.9     | 0.67            | 0.43, 1.04          | 0.075   | 1.32                  | 0.82, 2.12          | 0.3     |
| <b>End-stage renal disease</b>               | 2.52            | 0.82, 7.70          | 0.11    | 12.1                 | 4.71, 31.3          | <0.001  | 4.76            | 3.82, 5.94          | <0.001  | 2.42                  | 1.46, 4.02          | <0.001  |
| <b>Cancer</b>                                | 0.40            | 0.05, 3.21          | 0.4     | 1.63                 | 0.69, 3.86          | 0.3     | 0.86            | 0.66, 1.12          | 0.3     | 1.29                  | 0.89, 1.89          | 0.2     |
| <b>Antihypertensive med</b>                  | 0.18            | 0.05, 0.67          | 0.011   | 0.27                 | 0.10, 0.78          | 0.015   | 0.58            | 0.44, 0.76          | <0.001  | 0.95                  | 0.64, 1.41          | 0.8     |
| <b>Statins</b>                               | 0.92            | 0.31, 2.75          | 0.9     | 0.20                 | 0.05, 0.77          | 0.019   | 0.91            | 0.73, 1.13          | 0.4     | 0.96                  | 0.64, 1.42          | 0.8     |
| <b>Anticoagulant med</b>                     | 0.80            | 0.07, 9.05          | 0.9     | 4.60                 | 1.75, 12.1          | 0.002   | 1.24            | 0.87, 1.78          | 0.2     | 4.23                  | 2.83, 6.32          | <0.001  |
| <b>Antithrombotic med</b>                    | 2.24            | 0.66, 7.59          | 0.2     | 1.28                 | 0.38, 4.29          | 0.7     | 0.97            | 0.75, 1.25          | 0.8     | 1.13                  | 0.70, 1.81          | 0.6     |
| <b>Chronic obstructive pulmonary disease</b> |                 |                     |         | 0.00                 | 0.00, Inf           | >0.9    | 0.99            | 0.65, 1.49          | >0.9    | 1.19                  | 0.62, 2.29          | 0.6     |
| <b>Age-categories</b>                        |                 |                     |         |                      |                     |         |                 |                     |         |                       |                     |         |
| <45                                          |                 |                     |         |                      |                     |         | —               | —                   |         | —                     | —                   |         |
| 45-54                                        |                 |                     |         |                      |                     |         | 1.26            | 0.84, 1.88          | 0.3     | 2.53                  | 1.79, 3.58          | <0.001  |
| 55-64                                        |                 |                     |         |                      |                     |         | 1.10            | 0.74, 1.64          | 0.6     | 2.16                  | 1.45, 3.24          | <0.001  |
| 65-74                                        |                 |                     |         |                      |                     |         | 0.61            | 0.40, 0.92          | 0.019   | 1.99                  | 1.23, 3.20          | 0.005   |
| >75                                          |                 |                     |         |                      |                     |         | 0.12            | 0.07, 0.20          | <0.001  | 1.71                  | 0.84, 3.49          | 0.14    |
| <b>Valvular disease</b>                      |                 |                     |         |                      |                     |         | 0.88            | 0.51, 1.51          | 0.6     | 0.88                  | 0.40, 1.93          | 0.7     |
| <b>Peripheral arterial disease</b>           |                 |                     |         |                      |                     |         | 0.74            | 0.44, 1.26          | 0.3     | 1.26                  | 0.50, 3.16          | 0.6     |
| <b>Dementia</b>                              |                 |                     |         |                      |                     |         | 0.27            | 0.07, 1.11          | 0.070   | 3.93                  | 1.66, 9.28          | 0.002   |

<sup>1</sup> HR = Hazard Ratio, CI = Confidence Interval. Age was modeled as a continuous predictor.

**Supplementary Table S10: Cox regression model for mortality due to covid-19 in diabetes and controls**

| Characteristic                               | Type 1 diabetes |                     |         | Matched controls T1D |                     |         | Type 2 diabetes |                     |         | Matched controls T12D |                     |         |
|----------------------------------------------|-----------------|---------------------|---------|----------------------|---------------------|---------|-----------------|---------------------|---------|-----------------------|---------------------|---------|
|                                              | HR <sup>1</sup> | 95% CI <sup>1</sup> | p-value | HR <sup>1</sup>      | 95% CI <sup>1</sup> | p-value | HR <sup>1</sup> | 95% CI <sup>1</sup> | p-value | HR <sup>1</sup>       | 95% CI <sup>1</sup> | p-value |
| <b>Age</b>                                   | 1.10            | 1.05, 1.15          | <0.001  | 1.11                 | 1.05, 1.17          | <0.001  |                 |                     |         |                       |                     |         |
| <b>Sex</b>                                   | 0.71            | 0.29, 1.75          | 0.5     | 0.19                 | 0.05, 0.69          | 0.012   | 0.68            | 0.59, 0.77          | <0.001  | 0.58                  | 0.53, 0.65          | <0.001  |
| <b>Education</b>                             |                 |                     |         |                      |                     |         |                 |                     |         |                       |                     |         |
| Pre-secondary edu                            | —               | —                   |         | —                    | —                   |         | —               | —                   |         | —                     | —                   |         |
| Secondary edu                                | 0.75            | 0.28, 2.00          | 0.6     | 0.92                 | 0.31, 2.78          | 0.9     | 1.00            | 0.88, 1.14          | >0.9    | 0.93                  | 0.83, 1.03          | 0.2     |
| Post-secondary edu                           | 0.59            | 0.17, 2.05          | 0.4     | 1.15                 | 0.30, 4.39          | 0.8     | 0.89            | 0.74, 1.07          | 0.2     | 0.95                  | 0.82, 1.09          | 0.4     |
| <b>Marital status</b>                        |                 |                     |         |                      |                     |         |                 |                     |         |                       |                     |         |
| <i>Married</i>                               | —               | —                   |         | —                    | —                   |         | —               | —                   |         | —                     | —                   |         |
| Not married                                  | 0.75            | 0.30, 1.87          | 0.5     | 1.07                 | 0.42, 2.72          | 0.9     | 1.29            | 1.14, 1.46          | <0.001  | 1.30                  | 1.18, 1.43          | <0.001  |
| <b>Coronary heart disease</b>                | 0.83            | 0.29, 2.40          | 0.7     | 2.52                 | 0.74, 8.53          | 0.14    | 1.14            | 0.99, 1.30          | 0.063   | 1.00                  | 0.88, 1.14          | >0.9    |
| <b>Stroke</b>                                | 1.70            | 0.58, 4.98          | 0.3     | 5.01                 | 1.65, 15.2          | 0.005   | 1.60            | 1.39, 1.84          | <0.001  | 1.72                  | 1.52, 1.94          | <0.001  |
| <b>Heart failure</b>                         | 1.54            | 0.49, 4.85          | 0.5     | 0.88                 | 0.20, 3.87          | 0.9     | 1.44            | 1.24, 1.66          | <0.001  | 1.47                  | 1.28, 1.68          | <0.001  |
| <b>Atrial fibrillation</b>                   | 0.85            | 0.16, 4.57          | 0.8     | 0.86                 | 0.21, 3.58          | 0.8     | 1.24            | 1.03, 1.50          | 0.025   | 1.30                  | 1.11, 1.52          | <0.001  |
| <b>Chronic obstructive pulmonary disease</b> | 1.28            | 0.27, 6.08          | 0.8     | 1.91                 | 0.40, 9.06          | 0.4     | 1.22            | 1.01, 1.46          | 0.036   | 1.71                  | 1.49, 1.98          | <0.001  |
| <b>Asthma</b>                                | 3.36            | 1.04, 10.9          | 0.043   |                      |                     |         | 1.17            | 0.95, 1.44          | 0.13    | 1.16                  | 0.97, 1.38          | 0.11    |
| <b>Dementia</b>                              | 8.10            | 2.75, 23.9          | <0.001  | 7.01                 | 2.04, 24.2          | 0.002   | 4.65            | 4.03, 5.37          | <0.001  | 9.02                  | 8.11, 10.0          | <0.001  |
| <b>Renal disease</b>                         | 2.54            | 1.01, 6.36          | 0.047   | 1.94                 | 0.51, 7.32          | 0.3     | 2.54            | 2.23, 2.90          | <0.001  | 3.31                  | 2.93, 3.74          | <0.001  |
| <b>Cancer</b>                                | 1.08            | 0.38, 3.08          | 0.9     | 2.09                 | 0.78, 5.62          | 0.15    | 1.10            | 0.97, 1.25          | 0.12    | 1.11                  | 1.00, 1.23          | 0.043   |
| <b>Antihypertensive med</b>                  | 1.47            | 0.38, 5.64          | 0.6     | 0.45                 | 0.11, 1.80          | 0.3     | 0.72            | 0.60, 0.86          | <0.001  | 0.72                  | 0.63, 0.81          | <0.001  |
| <b>Statins</b>                               | 0.52            | 0.19, 1.47          | 0.2     | 0.81                 | 0.25, 2.71          | 0.7     | 0.60            | 0.53, 0.68          | <0.001  | 0.67                  | 0.60, 0.75          | <0.001  |
| <b>Anticoagulant med</b>                     | 1.16            | 0.22, 6.10          | 0.9     | 5.32                 | 1.51, 18.8          | 0.009   | 1.07            | 0.88, 1.29          | 0.5     | 1.14                  | 0.98, 1.33          | 0.092   |
| <b>Antithrombotic med</b>                    | 1.72            | 0.61, 4.85          | 0.3     | 1.45                 | 0.43, 4.92          | 0.6     | 1.24            | 1.08, 1.43          | 0.002   | 1.26                  | 1.12, 1.42          | <0.001  |
| <b>Income IQR</b>                            |                 |                     |         |                      |                     |         |                 |                     |         |                       |                     |         |
| <i>IQR 1</i>                                 |                 |                     |         | —                    | —                   |         | —               | —                   |         | —                     | —                   |         |
| <i>IQR 2</i>                                 |                 |                     |         | 1.99                 | 0.51, 7.70          | 0.3     | 0.80            | 0.70, 0.93          | 0.003   | 0.80                  | 0.72, 0.91          | <0.001  |
| <i>IQR 3</i>                                 |                 |                     |         | 1.06                 | 0.22, 5.00          | >0.9    | 0.75            | 0.62, 0.90          | 0.002   | 0.70                  | 0.61, 0.81          | <0.001  |
| <i>IQR4</i>                                  |                 |                     |         | 0.78                 | 0.15, 4.13          | 0.8     | 0.70            | 0.57, 0.87          | 0.001   | 0.60                  | 0.51, 0.71          | <0.001  |
| <b>Valvular disease</b>                      |                 |                     |         | 0.69                 | 0.08, 5.71          | 0.7     | 1.17            | 0.96, 1.43          | 0.12    | 0.94                  | 0.78, 1.13          | 0.5     |
| <b>Hypertension</b>                          |                 |                     |         | 1.19                 | 0.31, 4.60          | 0.8     | 1.69            | 1.40, 2.03          | <0.001  | 1.72                  | 1.51, 1.95          | <0.001  |
| <b>Alcohol</b>                               |                 |                     |         | 0.70                 | 0.08, 5.79          | 0.7     | 1.10            | 0.83, 1.46          | 0.5     | 1.31                  | 1.08, 1.59          | 0.006   |
| <b>Age-categories</b>                        |                 |                     |         |                      |                     |         |                 |                     |         |                       |                     |         |
| <45                                          |                 |                     |         |                      |                     |         | —               | —                   |         | —                     | —                   |         |
| 45-54                                        |                 |                     |         |                      |                     |         | 3.86            | 1.16, 12.9          | 0.028   | 2.29                  | 0.87, 6.05          | 0.095   |
| 55-64                                        |                 |                     |         |                      |                     |         | 5.98            | 1.87, 19.1          | 0.003   | 5.62                  | 2.29, 13.8          | <0.001  |
| 65-74                                        |                 |                     |         |                      |                     |         | 11.8            | 3.74, 37.0          | <0.001  | 14.8                  | 6.11, 35.9          | <0.001  |
| >75                                          |                 |                     |         |                      |                     |         | 24.9            | 7.94, 78.2          | <0.001  | 42.1                  | 17.4, 102           | <0.001  |
| <b>Peripheral arterial disease</b>           |                 |                     |         |                      |                     |         | 1.63            | 1.36, 1.94          | <0.001  | 1.26                  | 1.02, 1.55          | 0.032   |

<sup>1</sup> HR = Hazard Ratio, CI = Confidence Interval. Age was modeled as a continuous predictor.
